1 **Engineered Enzymes that Retain and Regenerate their Cofactors Enable Continuous-Flow**  
2 **Biocatalysis**

3 Carol J. Hartley<sup>1</sup>, Charlotte C. Williams<sup>2</sup>, Judith A. Scoble<sup>2</sup>, Quentin I. Churches<sup>2</sup>, Andrea North<sup>2</sup>, Nigel  
4 G. French<sup>1</sup>, Tom Nebl<sup>2</sup>, Greg Coia<sup>2</sup>, Andrew C. Warden<sup>1</sup>, Greg Simpson<sup>3</sup> Andrew R. Frazer<sup>3</sup>, Chantel  
5 Nixon Jensen<sup>4</sup>, Nicholas J. Turner<sup>4</sup>, Colin Scott<sup>1</sup>.

6 <sup>1</sup>*Biotechnology and Synthetic Biology Group, CSIRO Land & Water, Black Mountain Science &*  
7 *Innovation Precinct, Canberra, Australia*

8 <sup>2</sup>*CSIRO Manufacturing, 343 Royal Parade, Parkville, Victoria 3052, Australia*

9 <sup>3</sup>*CSIRO Manufacturing, Bag 10, Bayview Avenue, Clayton, Victoria 3168, Australia*

10 <sup>4</sup>*School of Chemistry, Manchester Institute of Biotechnology, University of Manchester, UK*

11

12 **Keywords:** nanomachines, nanofactory, biocatalysis, continuous flow biocatalysis, synthetic biology,  
13 glycerol kinase, glycerol-3-phosphate dehydrogenase, aldolase, reactor, enzyme immobilization, D-  
14 fagomine, cofactor immobilization, cofactor recycling.

15 For correspondence email: [colin.scott@csiro.au](mailto:colin.scott@csiro.au)

16

17

## 18 Introduction

19

20 **Biocatalysis is used for many chemical syntheses due to its high catalytic rates, specificities and**  
21 **operation under ambient conditions** <sup>1, 2</sup>. **Continuous-flow chemistry offers advantages to**  
22 **biocatalysis, avoiding process issues caused by substrate/product inhibition, equilibrium controlled**  
23 **limitations on yield and allosteric control** <sup>3</sup>. **Modular continuous-flow biochemistry would also allow**  
24 **the flexible assembly of different complex multistep reactions** <sup>3-6</sup>. **Here we tackle some technical**  
25 **challenges that currently prohibit the wide-spread use of continuous flow biocatalysis; cofactor**  
26 **immobilization and site-specific immobilization. We provide the first example of enzymes**  
27 **engineered to retain and recycle their cofactors, and the use of these enzymes in continuous**  
28 **production of chiral pharmaceutical intermediates.**

29 Enzyme immobilization for continuous-flow applications has been studied for some time; indeed, a  
30 number of industrial processes are currently based on such technologies <sup>4, 6-10</sup>. However, such  
31 processes have generally been limited to cofactor-independent enzymes, such as esterases. Cofactors,  
32 such as nicotinamide adenine dinucleotide (NAD<sup>+</sup>) and adenosine triphosphate (ATP), are used  
33 stoichiometrically unless recycled, typically by a second enzyme: without recycling, cofactors become  
34 prohibitively expensive for most industrial syntheses. As cofactors require diffusion for recycling, they  
35 are ill-suited for use in continuous-flow reactors and the lack of a practical engineering solution for  
36 the issue has stymied the use of cofactor-dependent enzymes in continuous-flow applications <sup>4</sup>;  
37 although, growing interest in immobilized biocatalysts for cell-free metabolic engineering has led to  
38 the development of a variety of enzyme-cofactor-carrier combinations <sup>5</sup>.

39 Herein, we propose a novel and generalizable chemo-genetic enzyme engineering approach that  
40 enables the fabrication of modular, multistep, biocatalytic, continuous-flow reactors using cofactor-  
41 dependent enzymes, thereby extending the utility of biocatalysis for continuous-flow production  
42 systems and cell-free metabolic engineering <sup>11</sup>.

## 43 Results

### 44 Nanomachine design

45 Our design for a biocatalyst that can retain and recycle its cofactor (a 'nanomachine') was inspired by  
46 enzymes that retain their substrates *via* covalent attachment during a reaction cascade involving  
47 multiple active sites, e.g. phosphopantetheine-dependent synthases <sup>12-14</sup> and lipoic acid-dependent  
48 dehydrogenases <sup>15</sup>. In such enzymes, the substrate is delivered from one active site to the next by a

49 flexible ‘swinging arm’ that is covalently attached to the protein. We have adopted a similar strategy,  
50 whereby a flexible swinging arm covalently attaches a cofactor to a synthetic, multidomain protein  
51 and delivers that cofactor to the different active sites of the fusion protein, allowing its simultaneous  
52 use and recycling, while preventing its diffusion (Figure 1).

53 The general design of our nanomachines is shown in Figure 1. Each nanomachine is comprised of three  
54 modules: a catalytic module that drives the desired synthesis reaction, a cofactor recycling module  
55 that regenerates the cofactor after use, and an immobilization module that allows site-specific,  
56 covalent conjugation to an activated surface. The modular design is intended to allow a small number  
57 of immobilization and cofactor recycling modules to be used with a wide variety of synthesis modules,  
58 thereby enabling diverse synthetic reactions using a relatively small library of core nanomachine  
59 components. It is envisaged that multiple nanomachines could be combined in series or in networks  
60 to produce a ‘nanofactory’ for the synthesis of complex chiral molecules using multi-enzyme cascade  
61 reactions.

62 In our design, the three modules of each nanomachine were encoded by a single gene for production  
63 in *E. coli* as a single protein with a short spacer (2-20 amino acids, Online methods) separating each  
64 module. A modified cofactor was designed that could be conjugated to the spacer between the  
65 catalytic and cofactor recycling modules. We used a maleimide-functionalized polyethylene glycol  
66 (PEG) for the flexible linker to allow movement of the modified cofactor between active sites. *In silico*  
67 modelling suggested that a chain length of twenty-four ethylene glycol units was long enough to allow  
68 ingress into both active sites. The amino acid spacer that separated the catalytic and cofactor recycling  
69 modules contained a single solvent exposed cysteine residue, which provided an accessible thiol group  
70 with which to tether the maleimide-functionalized PEGylated cofactor (Figure 1).

71

## 72 **Assembling the nanomachines**

73 For the prototype nanofactory we selected D-fagomine synthesis – coupling three nanomachines in  
74 series to convert glycerol (**1**) and 3-aminopropanal (**3**) into a chiral drug precursor (Figure 2). Total  
75 synthesis of this anti-diabetic piperidine iminosugar using non-biological catalysts is challenging, due  
76 to the complexity conferred by its two stereocenters, and eight possible diastereomers, with even  
77 recent advances only resulting in yields up to 65% of each diastereomer<sup>16</sup>. In our nanofactory (a  
78 cascade of nanomachines), glycerol is converted to dihydroxyacetone phosphate (DHAP) (**4**) by  
79 regiospecific phosphorylation and oxidation, *via* ATP and NAD<sup>+</sup>-dependent steps, respectively. A  
80 subsequent aldolase-catalyzed stereoselective aldol addition with 3-aminopropanal yields (3*S*,4*R*)-

81 amino-3,4-dihydroxy-2-oxyhexyl phosphate (3*S*,4*R*-ADHOP), which can be dephosphorylated with  
82 phosphorylase and cyclized to form D-fagomine<sup>17</sup> (6). For the purposes of purification, we elected to  
83 use the carboxybenzyl (Cbz)-protected derivative of 3-aminopropanal, yielding *N*-Cbz-3*S*,4*R*-ADHOP  
84 (5).

85 Prior comparison of enzymes that could be used for the first two steps of the model synthesis<sup>18</sup> had  
86 suggested that the most suitable enzymes for glycerol phosphorylation were a *Thermococcus*  
87 *kodakarensis* glycerol kinase (GlpK<sub>TK</sub>) and a *Mycobacterium smegmatis* acetate kinase (AceK<sub>MS</sub>). For  
88 the NAD<sup>+</sup>-dependent production of DHAP from glycerol-3-phosphate (G3P), *E. coli* glycerol-3-  
89 phosphate dehydrogenase (G3PD<sub>EC</sub>) and the water-forming NADH oxidase from *Clostridium*  
90 *aminovalepticum* (NOX<sub>Ca</sub>) were selected. The third reaction step is a cofactor-independent aldolase-  
91 catalyzed aldol addition. A monomeric fructose aldolase (FruA) homolog from *Staphylococcus*  
92 *carneus* was selected from a panel of five potential aldolases. Each of the enzymes incorporated into  
93 the nanomachine fusion proteins were selected for their compatibility in batch reactions<sup>18</sup>, high  
94 catalytic rates, relatively simple quaternary structures and thermostability (Supplementary Table 2).

95 For the conjugation module, we used a serine hydrolase enzyme coupled with a suicide inhibitor  
96 (trifluoroketone, TFK) that forms a site-specific and stable covalent bond between the inhibitor and  
97 the catalytic serine residue<sup>19</sup>. Esterase E2 from *Alicyclobacillus acidocaldarius* (E2<sub>Aa</sub>)<sup>20</sup> was selected  
98 for the serine hydrolase component as a highly stable, soluble, monomeric protein (Supplementary  
99 Table 2).

100 The genes encoding GlpK<sub>TK</sub> and AceK<sub>MS</sub> were fused, such that GlpK<sub>TK</sub> formed the N-terminus of the  
101 resultant protein and AceK<sub>MS</sub> formed the C-terminus (Fig. 2). The two modules were separated by a  
102 nineteen amino acid unstructured amino acid linker, containing a single, solvent-accessible cysteine  
103 residue that was used subsequently as the attachment point for the maleimide functionalized PEG<sub>24</sub>-  
104 ATP ([GSS]<sub>3</sub>C[GSS]<sub>3</sub>). A similar gene fusion was constructed used G3PD<sub>EC</sub> and NOX<sub>Ca</sub>, producing a  
105 protein in which G3PD<sub>EC</sub> formed the N-terminus and NOX<sub>Ca</sub> formed the C-terminus. The fused proteins  
106 retained or in some cases improved their original catalytic functions (Table 1), albeit some loss of  
107 activity (both  $K_M$  and  $k_{cat}$ ) was incurred for AceK<sub>MS</sub> and G3PD<sub>EC</sub>. The thermal stability of each of the  
108 fused enzymes appeared to be independent of one another i.e. protein unfolding of the component  
109 modules of each fusion are independent events (Supplementary Table 2).

110 The gene encoding the conjugation module (E2<sub>Aa</sub>) was fused with both the *glpK<sub>TK</sub>-aceK<sub>MS</sub>* and *g3pD<sub>EC</sub>-*  
111 *nox<sub>Ca</sub>* such that it formed the C-terminus of the encoded proteins (i.e., GlpK<sub>TK</sub>-AceK<sub>MS</sub>-E2<sub>Aa</sub> and G3PD<sub>EC</sub>-  
112 NOX<sub>Ca</sub>-E2<sub>Aa</sub>). Addition of the conjugation module had little effect on the kinetic performance or  
113 thermal stabilities of the other modules of each nanomachine (Table 1 & Supplementary Table 1). The

114 conjugation module was highly efficient (86-98% immobilization efficiency), and the immobilized  
115 enzymes retained their activity. This immobilization technique has the potential for broad applicability  
116 to other biocatalytic systems.

117 The cofactors were modified (Online methods) by functionalization of the C6-adenine-amine of ADP  
118 (**7**) or NAD<sup>+</sup> (**12**) to which a modified PEG<sub>24</sub> was added (Fig. 1; Supplementary Scheme 1). The PEG<sub>24</sub>  
119 linker included an *N*-hydroxysuccinimide ester that allowed reaction with the modified cofactor and a  
120 maleimide group for conjugation with the fusion proteins. Conjugation of MAL-PEG<sub>24</sub>-2AE-ADP (**11**)  
121 and MAL-PEG<sub>24</sub>-2AE-NAD<sup>+</sup> (**13**) to the nanomachines yielded enzymes that were active in batch  
122 reactions without the addition of exogenous cofactor, with catalytic constants equivalent or superior  
123 to individual enzyme components (Table 1; Supplementary Figure 3). Mass spectrometry of cofactor-  
124 conjugated proteolyzed nanomachines indicated that the cysteine in the linker between the catalytic  
125 and cofactor recycling modules reacted preferentially with the PEG<sub>24</sub>-maleimide modified cofactors  
126 (Supplementary Figure 4). Between 80-100% of the target cysteine residue was conjugated with the  
127 modified cofactor for both nanomachines.

128

## 129 **Function of Nanofactory**

130 The nanomachines were immobilized on TFK-activated agarose beads at densities of 1.6, 1.0 and 1.0  
131 milligrams protein per gram wet beads for the phosphorylation, oxidation and aldolase nanomachines,  
132 respectively, and packed into glass columns to produce three nanomachine packed bed reactor  
133 columns: a phosphorylation column (23.1 mL packed volume), an oxidation column (25.7 mL packed  
134 volume) and an aldol addition column (17.7 mL packed volume) (Figure 2).

135 Individual performance data for each nanomachine reactor (Figure 3) revealed that the maximum  
136 space time yields obtained ranged from ~11 mg L<sup>-1</sup> h<sup>-1</sup> mg<sup>-1</sup> (mg product per mg protein per liter per  
137 hour) for the oxidation reactor to ~70 mg L<sup>-1</sup> h<sup>-1</sup> mg<sup>-1</sup> for the phosphorylation reactor, with the aldol  
138 addition reactor yielding ~30 mg L<sup>-1</sup> h<sup>-1</sup> mg<sup>-1</sup>. This is consistent with the expected yields based on  $k_{cat}/K_M$   
139 values of the loaded enzymes (Table 1), e.g., for the phosphorylation reactor, 36.9 mg protein per  
140 column (2.7 nmol tethered biocatalysts) yielded 2.6 g product per litre (6.6 mM) per hour, equivalent  
141 to the expected 1,399 nmol per nmol of enzyme per second.

142 As reported elsewhere, when the glycerol-3-phosphate oxidation reaction and aldolase reaction were  
143 run in batch, yields were limited by product inhibition and substrate: product equilibrium, with  
144 substrate conversion of 88% and 63% respectively<sup>18, 21, 22</sup>. In our reactors, the phosphorylation and  
145 oxidation reactions were run to completion (i.e., complete 100% substrate conversion). It is likely that

146 running the system as a continuous flow reaction prevented the build-up of reaction products and so  
147 mitigated both product inhibition and equilibrium control, resulting in the high yields observed in our  
148 reactors.

149 The turnover numbers for the cofactors exceeded 10,000 (~11,000 for the NAD<sup>+</sup>-dependant oxidation  
150 reactor and ~17,000 for the ATP-dependant phosphorylation reactor; Figure 3a). In each case the  
151 reactions stopped because of the inactivation of one of the modules (AceK<sub>M<sub>s</sub></sub> for the phosphotransfer  
152 reactor; NOX<sub>Ca</sub> for the oxidation reactor) rather than the loss of cofactor. It is reasonable to assume  
153 that the turnover numbers would be higher if the enzymes were modified for greater stability, a  
154 relatively facile exercise with modern enzyme engineering approaches<sup>23, 24</sup>.

155 The three reactors were then combined in series (Figure 2b), with glycerol fed to the first reactor (the  
156 phosphorylation reactor) and a feed of Cbz-protected aldehyde entering the system between the  
157 oxidation and aldol addition reactors, to yield a three component 'nanofactory' for the production of  
158 Cbz-protected chiral sugar phosphates from glycerol. When run at 0.3 mL per minute, over 80% of  
159 glycerol was converted to enantiomerically pure *N*-Cbz-3*S*,4*R*-ADHOP in a single passage through the  
160 reactor (the product was confirmed by HPLC, LCMS and <sup>1</sup>H NMR analysis; Supplementary Figure 6).  
161 The percent conversion dropped to 40% at higher flow rates (1.0 mL.min<sup>-1</sup>), albeit this could be  
162 improved through reactor engineering (longer columns, greater biocatalyst loading, multiple passages  
163 through the reactor, *etc.*).

## 164 **Conclusions**

165 We have developed and successfully implemented a general chemo-genetic protein engineering  
166 strategy that enables cofactor-dependent, continuous-flow biocatalysis *via* the use of nanomachines:  
167 single molecule multi-enzyme biocatalysts that retain and recycle their cofactors. The engineered  
168 biocatalysts were used to construct a three step continuous-flow reactor system (a 'nanofactory') that  
169 performed well, with superior yields of D-fagomine precursor compared to chemical syntheses<sup>16</sup>, as  
170 well as high space-time yields and total turnover numbers for the catalysts and cofactors. Additionally,  
171 use of the biocatalysts in a continuous-flow system appears to have mitigated production inhibition  
172 and equilibrium control of yield, allowing very high substrate conversion.

173 We have used sugar analog synthesis as a model for our prototype 'nanofactory'; however, we believe  
174 that this approach is generalizable because of the modular design principles used in the design of both  
175 the 'nanomachines' and the 'nanofactories'. For the nanomachines, we envision a small library of  
176 conjugation and cofactor recycling modules that could be used in conjunction with a larger library of  
177 catalysis modules to provide access to a wide range of reactions. For example, whilst we have chosen

178 to demonstrate stereoselective aldol addition with the fructose-1,6-biphosphate aldolase FruA, use of  
179 the three other classes of DHAP-dependant aldolases (fuculose-1-phosphate FucA, rhamnulose-1-  
180 phosphate aldolase RhuA, tagatose-1,6-biphosphate aldolase TagA) <sup>22</sup> for the aldol addition reactor  
181 could be employed to generate all four ADHOP diastereomers with simple flow-path changes. The  
182 molecular modularity of the nanomachines is mirrored in the flow reactor design, providing a flexible  
183 platform for building complex, multistep biochemical pathways with both serial and parallel reactor  
184 compartments that could be extended into the development of artificial metabolic networks.

185

## 186 **Acknowledgements**

187 We would like to acknowledge the Science and Industry Endowment Fund (SIEF) for funding this work.  
188 We would like to thank Drs Matthew Wilding (Australian National University) and John Oakeshott  
189 (CSIRO) for their constructive comments during the preparation of this manuscript.

190

## 191 **Author Contributions**

192 CH, CS, CW, NT, JS, GS, GC conceived and designed the study. CH, JS, CW, NF, QI, AN, AF, TN, CN-J  
193 performed experiments. CH, CW, JS, AF, AN, TN, QI, CN-J analyzed data and AW performed  
194 computational modelling analysis. CH, CW, AN, JS, NF, TN and CS wrote the paper.

195

## 196 **Competing Interests Statement**

197 The authors have submitted a PCT Patent Application (WO 2017\_011870\_A1) based on the research  
198 results reported in this paper.

199

## 200 **References:**

201

- 202 1. Turner, N.J. & O'Reilly, E. Biocatalytic retrosynthesis. *Nature Chemical Biology* **9**, 285-288  
203 (2013).
- 204 2. Wells, A. & Meyer, H.-P. Biocatalysis as a Strategic Green Technology for the Chemical  
205 Industry. *ChemCatChem* **6**, 918-920 (2014).
- 206 3. Gandomkar, S., Żądło-Dobrowolska, A. & Kroutil, W. Extending Designed Linear Biocatalytic  
207 Cascades for Organic Synthesis. *ChemCatChem* **11**, 225-243 (2019).

- 208 4. Tamborini, L., Fernandes, P., Paradisi, F. & Molinari, F. Flow Bioreactors as Complementary  
209 Tools for Biocatalytic Process Intensification. *Trends in Biotechnology* (2017).
- 210 5. López-Gallego, F., Jackson, E. & Betancor, L. Heterogeneous Systems Biocatalysis: The Path to  
211 the Fabrication of Self-Sufficient Artificial Metabolic Cells. *Chemistry – A European Journal* **23**,  
212 17841-17849 (2017).
- 213 6. Britton, J., Majumdar, S. & Weiss, G.A. Continuous flow biocatalysis. *Chemical Society Reviews*  
214 (2018).
- 215 7. Zhang, Y.-H.P., Sun, J. & Ma, Y. Biomanufacturing: history and perspective. *Journal of Industrial*  
216 *Microbiology & Biotechnology*, 1-12 (2016).
- 217 8. Santacoloma, P.A. & Woodley, J.M. in *Cascade Biocatalysis* 231-248 (Wiley-VCH Verlag GmbH  
218 & Co. KGaA, 2014).
- 219 9. Weiser, D. et al. in *Biocatalysis: An Industrial Perspective* 397-430 (The Royal Society of  
220 Chemistry, 2018).
- 221 10. Thompson, M.P., Peñafiel, I., Cosgrove, S.C. & Turner, N.J. Biocatalysis Using Immobilized  
222 Enzymes in Continuous Flow for the Synthesis of Fine Chemicals. *Organic Process Research &*  
223 *Development* **23**, 9-18 (2019).
- 224 11. Dudley, Q.M., Karim, A.S. & Jewett, M.C. Cell-free metabolic engineering: Biomanufacturing  
225 beyond the cell. *Biotechnology Journal* **10**, 69-82 (2015).
- 226 12. Keatinge-Clay, A.T. Stereocontrol within polyketide assembly lines. *Nat. Prod. Rep.* **33**, 141-  
227 149 (2016).
- 228 13. Dutta, S. et al. Structure of a modular polyketide synthase. *Nature* **510**, 512-517 (2014).
- 229 14. Nguyen, C. et al. Trapping the dynamic acyl carrier protein in fatty acid biosynthesis. *Nature*  
230 **505**, 427-431 (2014).
- 231 15. Cronan, J.E., Zhao, X. & Jiang, Y.F. in *Advances in Microbial Physiology*, Vol 50, Vol. 50. (ed.  
232 R.K. Poole) 103-146 (2005).
- 233 16. Davies, S.G., Fletcher, A.M., Kennedy, M.S., Roberts, P.M. & Thomson, J.E. Asymmetric  
234 synthesis of d-fagomine and its diastereoisomers. *Tetrahedron* **74**, 7261-7271 (2018).
- 235 17. Castillo, J.A. et al. Fructose-6-phosphate Aldolase in Organic Synthesis: Preparation of d-  
236 Fagomine, N-Alkylated Derivatives, and Preliminary Biological Assays. *Organic Letters* **8**, 6067-  
237 6070 (2006).
- 238 18. Hartley, C.J. et al. Sugar analog synthesis by in vitro biocatalytic cascade: A comparison of  
239 alternative enzyme complements for dihydroxyacetone phosphate production as a precursor  
240 to rare chiral sugar synthesis. *Plos One* **12** (2017).
- 241 19. Minařík, A. et al. Ligand-Directed Immobilization of Proteins through an Esterase 2 Fusion Tag  
242 Studied by Atomic Force Microscopy. *ChemBioChem* **9**, 124-130 (2008).
- 243 20. Huang, Y., Humenik, M. & Sprinzl, M. Esterase 2 from *Alicyclobacillus acidocaldarius* as a  
244 reporter and affinity tag for expression and single step purification of polypeptides. *Protein*  
245 *Expression and Purification* **54**, 94-100 (2007).
- 246 21. Wang, W., Liu, M., You, C., Li, Z. & Zhang, Y.-H.P. ATP-free biosynthesis of a high-energy  
247 phosphate metabolite fructose 1,6-diphosphate by *in vitro* metabolic engineering. *Metabolic*  
248 *Engineering* **42**, 168-174 (2017).
- 249 22. Schumperli, M., Pellaux, R. & Panke, S. Chemical and enzymatic routes to dihydroxyacetone  
250 phosphate. *Appl Microbiol Biotechnol* **75**, 33-45 (2007).
- 251 23. Jemli, S., Ayadi-Zouari, D., Hlima, H.B. & Bejar, S. Biocatalysts: application and engineering for  
252 industrial purposes. *Crit. Rev. Biotechnol.* **36**, 246-258 (2016).
- 253 24. Modarres, H.P., Mofrad, M.R. & Sanati-Nezhad, A. Protein thermostability engineering. *RSC*  
254 *Advances* **6**, 115252-115270 (2016).
- 255 25. Hartley, C.J. et al. Sugar analog synthesis by in vitro biocatalytic cascade: A comparison of  
256 alternative enzyme complements for dihydroxyacetone phosphate production as a precursor  
257 to rare chiral sugar synthesis. *PLOS ONE* **12**, e0184183 (2017).



- 258 26. Peat, T.S. et al. Cyanuric acid hydrolase: evolutionary innovation by structural concatenation.  
259 *Molecular microbiology* **88**, 1149-1163 (2013).
- 260 27. Koga, Y. et al. Thermostable glycerol kinase from a hyperthermophilic archaeon: gene cloning  
261 and characterization of the recombinant enzyme. *Protein Engineering* **11**, 1219-1227 (1998).
- 262 28. Aceti, D.J. & Ferry, J.G. Purification and characterization of acetate kinase from acetate-grown  
263 *Methanosarcina thermophila*. Evidence for regulation of synthesis. *Journal of Biological*  
264 *Chemistry* **263**, 15444-15448 (1988).
- 265 29. Kawasaki, S., Ishikura, J., Chiba, D., Nishino, T. & Niimura, Y. Purification and characterization  
266 of an H<sub>2</sub>O-forming NADH oxidase from *Clostridium aminovalericum*: existence of an oxygen-  
267 detoxifying enzyme in an obligate anaerobic bacteria. *Archives of Microbiology* **181**, 324-330  
268 (2004).
- 269 30. Brockamp, H.P. & Kula, M.R. Purification and characterization of a class I fructose 1,6-  
270 bisphosphate aldolase from *Staphylococcus carnosus*. *Applied Microbiology and*  
271 *Biotechnology* **34**, 287-291 (1990).
- 272 31. Manco, G. et al. Overexpression and properties of a new thermophilic and thermostable  
273 esterase from *Bacillus acidocaldarius* with sequence similarity to hormone-sensitive lipase  
274 subfamily. *The Biochemical journal* **332 ( Pt 1)**, 203-212 (1998).
- 275 32. Prieto-Blanco, M.C., Iglesias, M.P., López-Mahía, P., Lorenzo, S.M. & Rodríguez, D.P.  
276 Simultaneous determination of carbonyl compounds and polycyclic aromatic hydrocarbons in  
277 atmospheric particulate matter by liquid chromatography–diode array detection–  
278 fluorescence detection. *Talanta* **80**, 2083-2092 (2010).

279

280

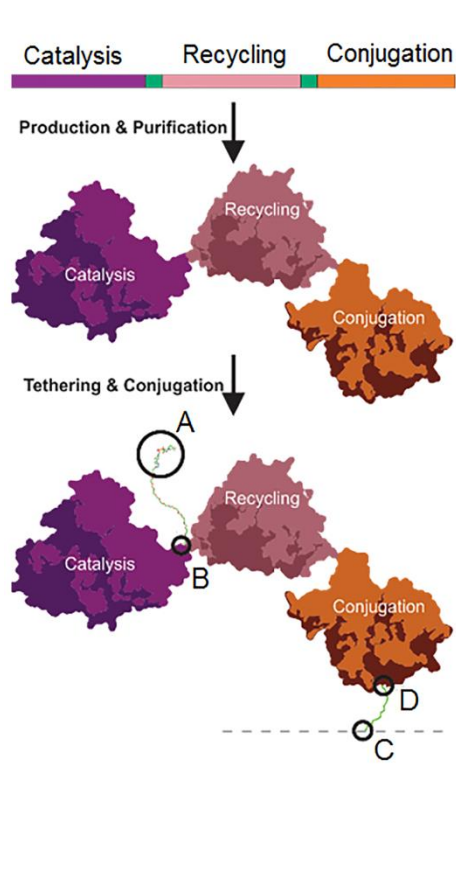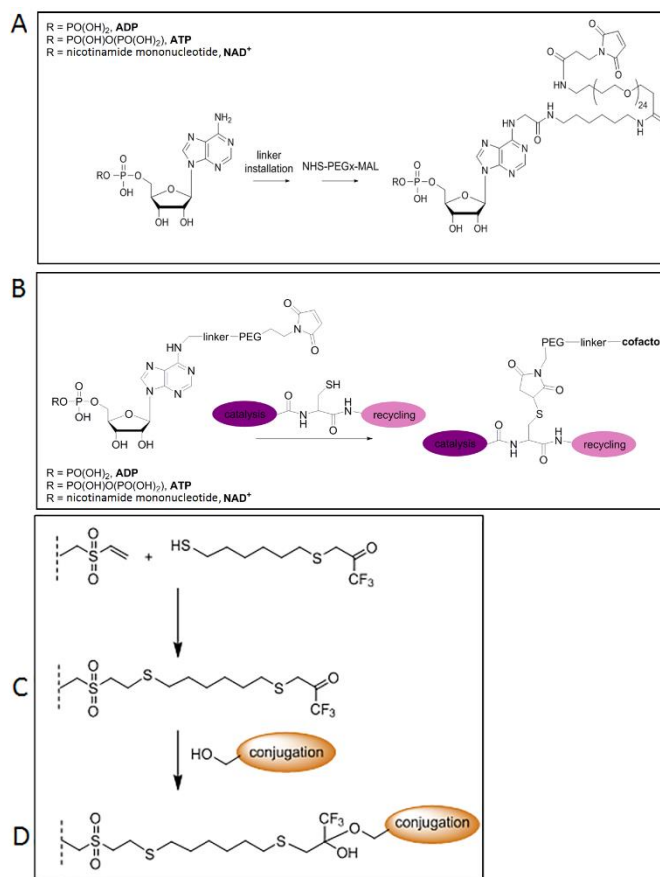

281

282

283 **Fig. 1. Nanomachine design.** Each nanomachine comprises a genetically encoded multi-enzyme fusion  
284 protein capable of retaining and recycling a tethered cofactor. The nanomachine contains three  
285 protein domains: a cofactor-dependant catalytic enzyme domain (purple), a cofactor-recycling domain  
286 (pink) with short amino acid spacer regions between these domains (see Online Methods for details)  
287 A cofactor that has been modified by amine activation to allow for linker installation (**A**) is tethered to  
288 the protein through maleimide: thiol conjugation *via* a solvent exposed cysteine located in the spacer  
289 region between the catalysis and recycling domains (**B**). The esterase conjugation domain (orange)  
290 allows immobilization of the nanomachine to a surface by the formation of a covalent bond between  
291 a surface attached trifluoroketone (**C**) and the active site serine of the esterase (**D**).

292

293

294

295

296

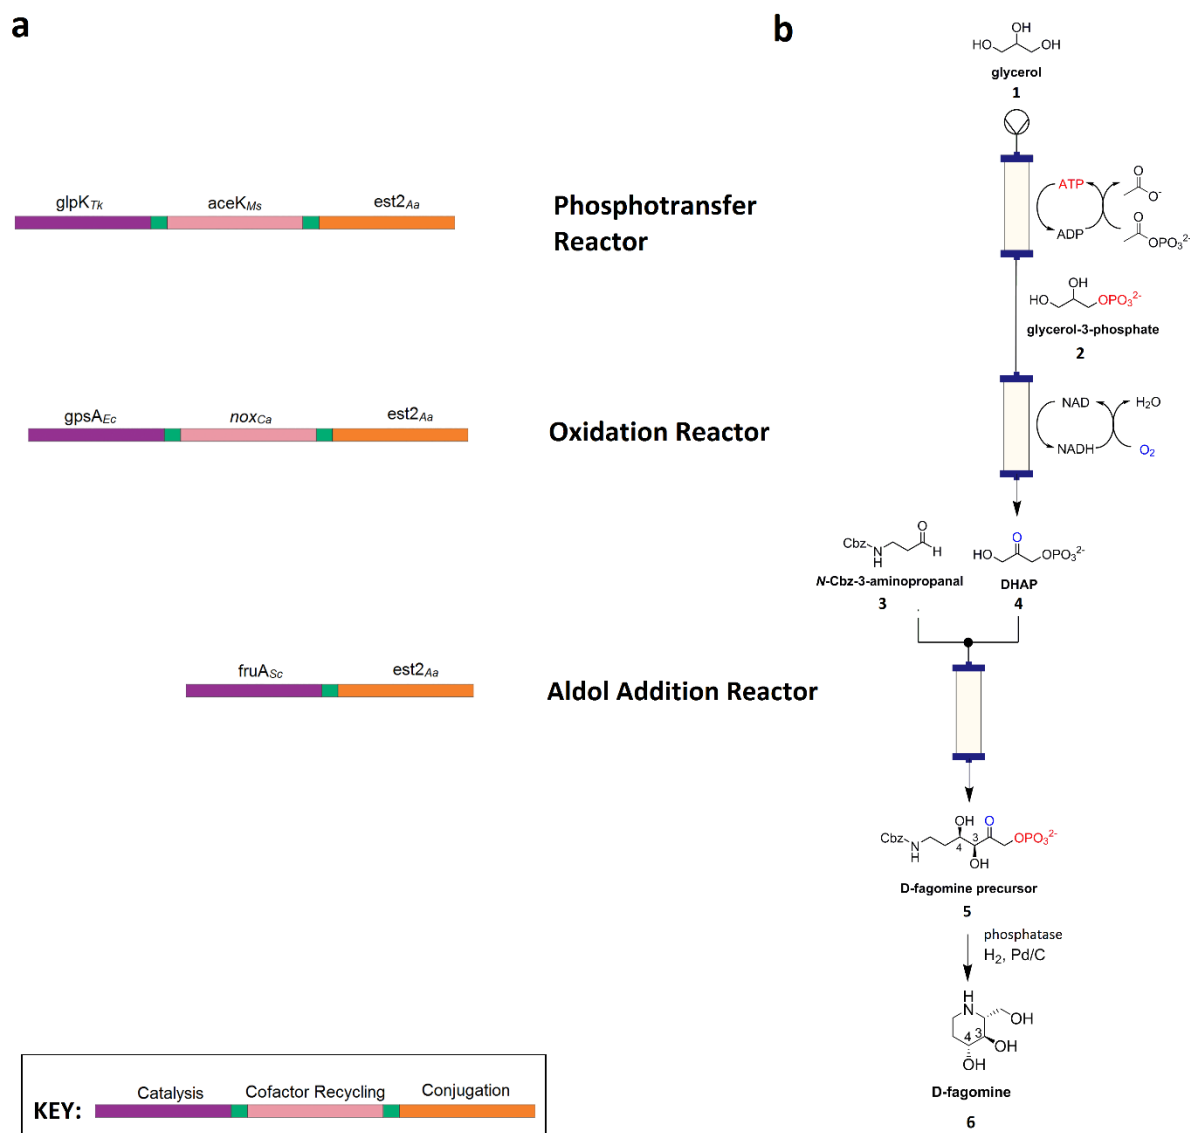

297

298 **Figure 2. Nanofactory design for the conversion of glycerol to a chiral D-fagomine precursor. a,**  
 299 **Composition of the three nanomachines each comprising a cofactor-dependant catalytic enzyme**  
 300 **domain (purple), a cofactor-recycling domain (pink) and the conjugation domain (orange), with amino**  
 301 **acid spacer regions between these domains (green). b, Corresponding three part nanofactory and**  
 302 **associated biotransformations (phosphotransfer, oxidation and aldol addition) for D-fagomine**  
 303 **synthesis. Enzyme name abbreviations are as defined in the text.**

304

305

306

**a**

| Nanomachine                                                                                                       | Flow rate (mL min <sup>-1</sup> ) | R <sub>t</sub> (min) | Product Yield (mmol) | Total Turnover Number (cofactor) | Space Time Yield (g L <sup>-1</sup> hr <sup>-1</sup> g <sup>-1</sup> ) |
|-------------------------------------------------------------------------------------------------------------------|-----------------------------------|----------------------|----------------------|----------------------------------|------------------------------------------------------------------------|
| <b>Phosphotransfer Reactor</b><br>GlpK <sub>Tx</sub> -ATP <sub>1eth</sub> -AceK <sub>Mz</sub> -Est2 <sub>Δa</sub> | 0.25                              | 84.8                 | 1.17                 | 16848                            | 69.95                                                                  |
| <b>Oxidation Reactor</b><br>G3PD <sub>Ec</sub> -NAD <sub>1eth</sub> -NOX <sub>Cs</sub> -Est2 <sub>Δa</sub>        | 0.25                              | 113.2                | 0.95                 | 10839                            | 10.75                                                                  |
| <b>Aldol Addition Reactor</b><br>FruA <sub>Sz</sub> -Est2 <sub>Δa</sub>                                           | 0.1                               | 177                  | 4.67                 | NA                               | 28.58                                                                  |

**b**

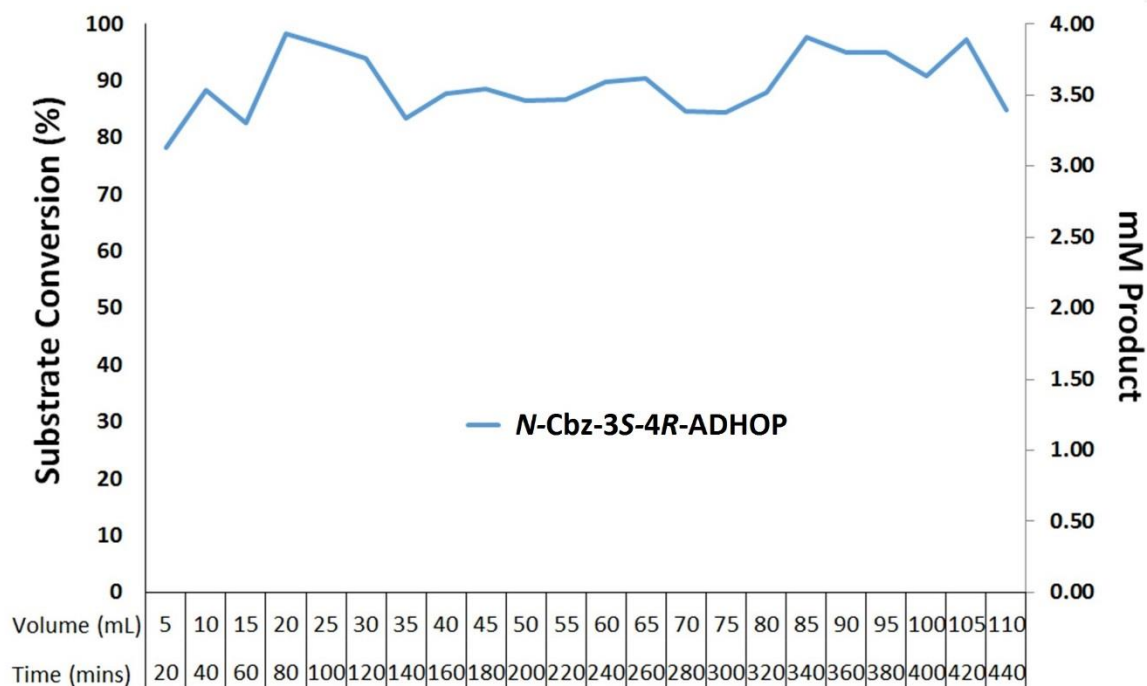

307

308

309 **Figure 3. Functional analysis of the three-step nanofactory for the synthesis of D-fagomine from**  
 310 **glycerol. a,** Product yield, cofactor total turnover numbers and space-time yield metrics for each  
 311 nanomachine reactor. **b,** The nanofactory maintained continuous product yields of between 85-90%  
 312 conversion of glycerol to *N*-Cbz-3S,4R-amino-3,4-dihydroxy-2-oxyhexyl phosphate (*N*-Cbz-3S,4R-  
 313 ADHOP) for more than 7 h.

314 **Table 1. Steady-state kinetic data for the enzymes comprising each nanomachine.**

|                                                                                 | $K_M$<br>( $\mu\text{M}$ ) | $K_M$<br>( $\mu\text{M}$ ) | $k_{\text{cat}}$<br>( $\text{s}^{-1}$ ) | $k_{\text{cat}}/K_M$<br>( $\text{s}^{-1}\cdot\text{M}^{-1}$ ) |
|---------------------------------------------------------------------------------|----------------------------|----------------------------|-----------------------------------------|---------------------------------------------------------------|
|                                                                                 | <b>Cofactor</b>            | <b>Substrate</b>           |                                         |                                                               |
| <b>Glycerol phosphorylation</b>                                                 |                            |                            |                                         |                                                               |
| GlpK <sub>TK</sub>                                                              | 111 ± 12                   | 15 ± 2                     | 940 ± 8                                 | 6.1 × 10 <sup>7</sup>                                         |
| GlpK <sub>TK</sub> -AceK <sub>M5</sub>                                          | 123 ± 21                   | 15 ± 4                     | 1,125 ± 115                             | 7.7 × 10 <sup>7</sup>                                         |
| GlpK <sub>TK</sub> -AceK <sub>M5</sub> -Est2 <sub>Aa</sub>                      | 115 ± 19                   | 16 ± 4                     | 1,399 ± 54                              | 8.6 × 10 <sup>7</sup>                                         |
| GlpK <sub>TK</sub> -ATP <sub>teth</sub> -AceK <sub>M5</sub> -Est2 <sub>Aa</sub> | ND                         | 16 ± 2                     | 1,408 ± 95                              | 8.8 × 10 <sup>7</sup>                                         |
| <b>Acetate dephosphorylation (ADP phosphorylation)</b>                          |                            |                            |                                         |                                                               |
| AceK <sub>M5</sub>                                                              | 113 ± 9                    | 390 ± 8                    | 1,103 ± 126                             | 2.8 × 10 <sup>6</sup>                                         |
| GlpK <sub>TK</sub> -AceK <sub>M5</sub>                                          | 424 ± 35                   | 1,400 ± 126                | 759 ± 53                                | 5.4 × 10 <sup>5</sup>                                         |
| GlpK <sub>TK</sub> -AceK <sub>M5</sub> -Est2 <sub>Aa</sub>                      | 398 ± 29                   | 1,197 ± 114                | 1,084 ± 27                              | 9.1 × 10 <sup>5</sup>                                         |
| GlpK <sub>TK</sub> -ATP <sub>teth</sub> -AceK <sub>M5</sub> -Est2 <sub>Aa</sub> | ND                         | ND                         | ND                                      | ND                                                            |
| <b>Glycerol-3-phosphate oxidation</b>                                           |                            |                            |                                         |                                                               |
| G3PD <sub>Ec</sub>                                                              | 158 ± 24                   | 59 ± 4                     | 85 ± 11                                 | 1.4 × 10 <sup>6</sup>                                         |
| G3PD <sub>Ec</sub> -NOX <sub>Ca</sub>                                           | 176 ± 12                   | 369 ± 17                   | 7 ± 0.7                                 | 1.8 × 10 <sup>4</sup>                                         |
| G3PD <sub>Ec</sub> -NOX <sub>Ca</sub> -Est2 <sub>Aa</sub>                       | 164 ± 10                   | 659 ± 47                   | 7 ± 0.6                                 | 1.1 × 10 <sup>4</sup>                                         |
| G3PD <sub>Ec</sub> -NAD <sub>teth</sub> -NOX <sub>Ca</sub> -Est2 <sub>Aa</sub>  | ND                         | 659 ± 47                   | 9 ± 0.6                                 | 1.4 × 10 <sup>4</sup>                                         |
| <b>Oxygen reduction (NADH oxidation)</b>                                        |                            |                            |                                         |                                                               |
| NOX <sub>Ca</sub>                                                               | 258 ± 21                   | ND                         | 1,252 ± 182                             | 4.9 × 10 <sup>6</sup>                                         |
| G3PD <sub>Ec</sub> -NOX <sub>Ca</sub>                                           | 276 ± 9                    | ND                         | 1,714 ± 252                             | 6.2 × 10 <sup>6</sup>                                         |
| G3PD <sub>Ec</sub> -NOX <sub>Ca</sub> -Est2 <sub>Aa</sub>                       | 266 ± 15                   | ND                         | 1,224 ± 114                             | 4.6 × 10 <sup>6</sup>                                         |
| G3PD <sub>Ec</sub> -NAD <sub>teth</sub> -NOX <sub>Ca</sub> -Est2 <sub>Aa</sub>  | ND                         | ND                         | ND                                      | ND                                                            |
| <b>Aldol addition</b>                                                           |                            |                            | <b>DHAP</b>                             |                                                               |
| FruA <sub>Sc</sub>                                                              | NA                         | 500 ± 80                   | 16 ± 2                                  | 3.2 × 10 <sup>4</sup>                                         |
| FruA <sub>Sc</sub> -Est2 <sub>Aa</sub>                                          | NA                         | 70 ± 11                    | 9 ± 1                                   | 1.3 × 10 <sup>5</sup>                                         |
| <b>Esterase<sup>1</sup></b>                                                     |                            |                            |                                         |                                                               |
| Est2 <sub>Aa</sub>                                                              | NA                         | 180 ± 40                   | 153 ± 12                                | 8.3 × 10 <sup>5</sup>                                         |
| GlpK <sub>TK</sub> -AceK <sub>M5</sub> -Est2 <sub>Aa</sub>                      | NA                         | 165 ± 18                   | 149 ± 16                                | 8.8 × 10 <sup>5</sup>                                         |
| G3PD <sub>Ec</sub> -NOX <sub>Ca</sub> -Est2 <sub>Aa</sub>                       | NA                         | 152 ± 28                   | 159 ± 11                                | 9.0 × 10 <sup>5</sup>                                         |
| FruA <sub>Sc</sub> -Est2 <sub>Aa</sub>                                          | NA                         | 100 ± 10                   | 165 ± 18                                | 1.7 × 10 <sup>6</sup>                                         |

315 <sup>1</sup> (*p*-nitrophenyl acetate as substrate). ND- not determined. NA- not applicable.

316

## 317 **ON-LINE METHODS**

318

### 319 **General**

320 Unless otherwise stated in the text, all chemicals were purchased from Sigma-Aldrich (Merck,  
321 Australia). For the flow reactors, regulated flow rates and mixing was provided by a modified Biologic  
322 DuoFlow system with a Biologic Fraction Collector (Biorad laboratories Inc., USA) for collection of  
323 samples. Biologic DuoFlow software v 5.10 Build 2 (Biorad Laboratories Inc., USA) was used to program  
324 and control the system, as per manufacturer's instructions. All restriction enzymes and T4 DNA ligase  
325 enzymes used for DNA manipulation were purchased from New England Bioabas (NEB, USA). All PEG  
326 compounds were purchased from Quanta BioDesign Ltd (Plain City, OH, USA) and used as received. All  
327 other reagents and solvents were obtained from Sigma-Aldrich (Merck), Acros Organics or TCI  
328 Chemicals and used as-purchased. Nuclear Magnetic resonance (NMR) spectra were recorded with a  
329 Bruker Avance 400 MHz spectrometer in the deuterated solvents as specified. Chemical shifts ( $\delta$ ) were  
330 calibrated against residual solvent peaks and are quoted in ppm relative to TMS.

331 Unless otherwise specified in the text, analytical high-performance liquid chromatography (aHPLC)  
332 was performed with a Waters Alliance e2695 Separations Module equipped with Waters 2998 PDA  
333 and Acquity QDa detectors, using a Waters XBridge BEH C18 column, 130 Å, 3.5  $\mu\text{m}$ , 2.1 x 50 mm. The  
334 following buffer system and gradients were applied: Milli-Q water (Merk Millipore) with 0.1% formic  
335 acid (Buffer A) and  $\text{CH}_3\text{CN}$  with 0.1% formic acid (Buffer B), with a gradient of 0-90% Buffer B unless  
336 otherwise specified.

337 Semi-preparative reversed-phase high performance liquid chromatography (RP-pHPLC) was  
338 undertaken using a Shimadzu SPD-10A UV-Vis detector with UV detection at  $\lambda$  260 nm. The system  
339 was equipped with a Shimadzu 322 pump and Gilson 255 Liquid Handler and set at a flow rate of 10  
340  $\text{mL min}^{-1}$ . Peak separation was achieved using a Vydac 218TP1022 C18, 10  $\mu\text{m}$ , 22 x 250 mm column.  
341 Solvent gradients used Milli-Q water with 0.1% TFA (Buffer A) and acetonitrile with 0.1% TFA (Buffer  
342 B), with a gradient of 0-70% Buffer B unless otherwise specified.

343

### 344 **DNA manipulation**

345

346 The pAF1 vector that encodes the DHAP-dependent fructose-1,6-biphosphate aldolase from  
347 *Staphylococcus carnosus* was a gift from Dr A. Frazer (University of Manchester, Manchester, UK). For  
348 all other constructs, the gene of interest was sourced as described previously<sup>25</sup>, codon-optimized for  
349 expression in *E. coli* and synthesized by GeneArt (ThermoFisher Scientific, Germany), then cloned into

350 pETCC2<sup>26</sup> (a modified version of pET14b, Novagen) using *Nde* I and *Bam* HI or *Eco* RI sites, to create  
351 an in-frame *N*-terminal hexa-histidine tag. Genes encoding fusions between the catalytic and cofactor-  
352 recycling domains (GlpK<sub>TK</sub>-AceK<sub>MS</sub> and G3PD<sub>EC</sub>-NOX<sub>Ca</sub>) were synthesized. Two versions of the synthetic  
353 genes were made. In the first version, a single open reading frame containing both domains, separated  
354 by a linker and terminating in a STOP codon were synthesized, and included a 5' *Nde* I site and 3' *Bam*  
355 HI site for cloning. The second version differed in that the stop codon was omitted and a 3' *Sph* I site  
356 was included to allow construction of the fusions that included the conjugation domain. The versions  
357 with a STOP codon were cloned into pETCC2 for expression and purification of GlpK<sub>TK</sub>-AceK<sub>MS</sub> and  
358 G3PD<sub>EC</sub>-NOX<sub>Ca</sub>, whilst the *Nde* I-*Sph* I versions were subcloned into a prepared pETCC2 backbone  
359 containing the esterase *e2*<sub>Aa</sub> gene to create a genetic fusion via the *Sph* I site, with a short Gly-Ser  
360 repeat spacer. This yielded genes encoding the GlpK<sub>TK</sub>-AceK<sub>MS</sub>-E2<sub>Aa</sub> and G3PD<sub>EC</sub>-NOX<sub>Ca</sub>-Est2<sub>Aa</sub>  
361 nanomachines. A similar strategy was used to fuse *fru*<sub>Sc</sub> with *e2*<sub>Aa</sub> via the *Sph* I site yielding a construct  
362 encoding Fru<sub>Sc</sub>-Est2<sub>Aa</sub> (Supplementary Figure 1). The final insertion fragments used for each of the  
363 nanomachines are depicted in Supplementary Figure 1. All constructs were confirmed by DNA  
364 sequencing (Macrogen, S. Korea).

365

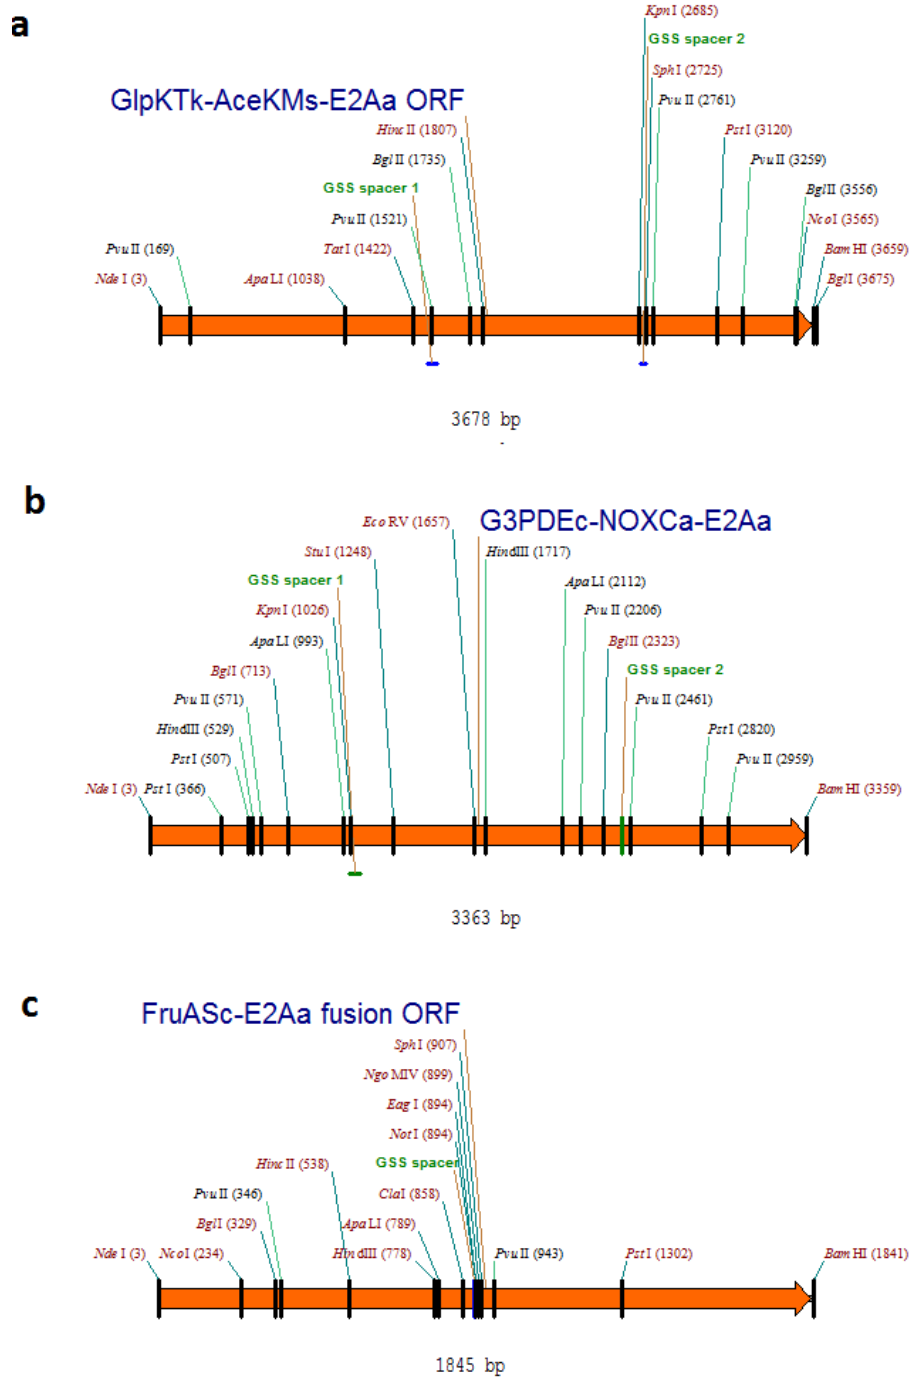

366

367 **Supplementary Figure 1. DNA insertion regions for each of the nanomachine expression constructs**  
 368 encoding GlpK<sub>TK</sub>-AceK<sub>MS</sub>-E2Aa (a), G3PDE<sub>EC</sub>-NOX<sub>Ca</sub>-Est2Aa (b) and FruA<sub>Sc</sub>-Est2Aa (c), combining each  
 369 multienzyme fusion as a single ORF for insertion into pETCC2 via the *Nde* 1-*Bam* H1 sites to create an  
 370 in-frame 5'-hexahistidine tag.  
 371

371

372

373 **Engineered Fusion Protein Sequences**



374 The hexaHIS-tagged individual and fusion protein sequences used in this study are listed below, with  
375 linker regions between the protein domains highlighted in bold and underlined, and the cysteine  
376 required for tethering modified cofactor highlighted in red bold font:

377

378 **G3P<sub>D<sub>Ec</sub></sub>**

379 MNQRNASMTVIGAGSYGTALAITLARNGHEVVLWGHDP EHIATLERDRCNA AFLPDVFPD TLHLESD  
380 LATALAASRNILVVVPSHVFG E VLRQIKPLMRPDARLVWATKGLEAETGRLLQDVAREALGDQIPLAV  
381 ISGPTFAKEL AAGLP TAI SLASTDQTFADDLQQLLHCGKSF RVYSNPDFIGVQLGGAVKNVIAIGAGM  
382 SDGIGFGANARTALITRGLAEMSRLGAALGADPATFMGMAGLGD LVL TCTDNQSRNRRFGMMLGQGMD  
383 VQSAQEKIGQVVEGYRNTKEVRELAHRFGVEMPIT E E IYQVLYCGKNAREAA L TLLGRARKDERS SH\*

384 **Nox<sub>Ca</sub>**

385 MGSSHHHHHHSSGLVPRGSHMKIVVIGCTHAGTAAVKTILKENPEAEITIFERN D NISFLSCGIALYV  
386 GG VVKDPAGLFYSNPEELSKMGANVKIKHNVKSIDTKSKKVIAEDMNTGEEIEVSYDKLVNTTGSWPI  
387 IPPIPGIESKNILLCKNYDQANVIRQTKDAKKIVIVGGGYIGIELVEAFQKSGKQVTLIDGLDRILN  
388 KYLDKEFTDILEDLKKNGINLALDQCVKSFKANENGEVTSVETTKGEYEADMVILCVGFRPNNELLK  
389 GKVDMLPNDAIIVDEYMRTSDPDI FAAGDSCAVHYNPNGNYAYIPLATNAVRMGMLIGKNI STPKVKY  
390 RGTQSTSGLNLF GYNIGSTGVTVSGAPQIGLNVR SVIVKDNYP EFMP TNEE IIMQLVYEVGTNRIVG  
391 GQVMSKYDITQSANTLSLAIQNKMTIEDLAYVDFFFQPHFDRPWNYLNI LGLAALEQ E GL\*

392 **GlpK<sub>Tk</sub>**

393 MGSSHHHHHHSSGLVPRGSHMEKFVLSLDEGTT SARAIIFDRESNIHGIGQYEFQHYPRPGWVEHNP  
394 EEIWD AQLRAIKDAIQSARIEPNQIAAIGVTNQRETTLVWDKDGKPLYNAIVWQCRRTAEMVEEIKRE  
395 YGTMIKEKTGLVDPDAYFSASKLWLLDNVPLREKA EKGEVMFGTVDTFLIYRLTGEHVTDYSNASRT  
396 MLFN IKKL DWDELLELFDIPE SVLPEVRESSEVYGYTKKELLGAEIPVSGDAGDQQAALFGQA AFEA  
397 GMVKATYGTGSFILVNTDKMVLYSNLLTTIAWGLNGRVS YALEGSI FVTGAAVQWLRDGIKIKHAS  
398 ETEELATKLESNEG VYFVPAFVGLGAPYWDQFARGIIIGITRGTGREHLARATLEAIAYLTRDVVDEM  
399 EKL VQIKELRVDGGATANDFLMQFQADILNRKVIRPVVKE T TALGAAYLAGLAVDYWADTREIAELWK  
400 AERIFEPKMDEKTRERLYKGWKEAVKRAMGWAKVVDSAKSN\*

401 **AceK<sub>M<sub>s</sub></sub>**

402 MGSSHHHHHHSSGLVPRGSHMTVLVNVSGSSSLKYAVVRPASGEFLADGIEEIGSGAVDPDHDAALRA  
403 AFDELA AAGLHLEDL DLKAVGHRMVHGKTFYKPSVVDDELIAKARELSPLAPLHNPPAIK GIEVARK  
404 LLPDLPHIAVFDTAFFHDL P APASTYAIDRELAETWHIKRYGFHGTSHEYVSQQAIFLDRPLESLNQ  
405 IVLHLGN GASASAVAGGKAVDTS MGLTPMEGLVMGTRSGDIDPGVIMYLWRTAGMSVDDIESMLNRRS  
406 GVLGLGGASDFRKLRELIESGDEHAKLAYDVYI HRLRKYIGAYMAVLGR TDVISFTAGVGENVPPVRR  
407 DALAGLGG LGIEID DALNSAKSDEPRLISTPDSRVTVLVVPTNEELAIARACVGVV\*

408 **GlpK<sub>Tk</sub>-AceK<sub>M5</sub>**

409 MGSSHHHHHHSSGLVPRGSHMEKFVLSLDEGTT SARAI I FDRESNIHGIGQYEFPPQHYPRPGWVEHNP  
410 EEIWD AQLRAIKDAIQSARIEPNQIAAIGVTNQRETTLVWDKDGKPLYNAIVWQCRRTAEMVEEIKRE  
411 YGTMIKEKTGLVDPDAYFSASKLKWLLDNVPGLEKAEKGEVMFGTVDTFLIYRLTGEHVTDYSNASRT  
412 MLFNIKKLDWDELLELFDIPESVLPEVRESSEVYGYTKKELLGAEIPVSGDAGDQQAALFGQAAFEA  
413 GMVKATYGTGSFILVNTDKMVLVSDNLLTTIAWGLNGRVSYALEGSI FVTGAAVQWLRDGIKIIKHAS  
414 ETEELATKLESNEGVYFVPAFVGLGAPYWDQFARGIIIGITRGTGREHLARATLEAIAYLTRD VVDEM  
415 EKL VQIKELRVDGGATANDFLMQFQADILNRKVIRPVVKETTALGAA YLAGLAVDYWADTREIAELWK  
416 AERIFEPKMDEKTRERLYKGWKEAVKRAMGWAKVVDSAKSNGSSGSSGSSCGSSGSSGSSMTVLVVNS  
417 GSSSLKYAVVRPASGEFLADGIIIEIGSGAVPDHDAALRAAFDELAAGLHLEDL DLKAVGHRMVHGG  
418 KTFYKPSVVDELI AKARELSPLAPLHNPPAIK GIEVARKLLPDLPHIAVFDTAFFHDL P APASTYAI  
419 DRELAETWHIKRYGFHGT SHEYVSQQAAIFLDRPLESLNQIVLHLNGASASAVAGGKAVD TSMGLTP  
420 MEG LVMGTRSGDIDPGVIMYLWRTAGMSVDDIESMLNRRSGVLGLGGASDFRKLRELIESGDEHAKLA  
421 YDVYIHR LRKYIGAYMAVLGR TDVISFTAGVGENVPPVRRDALAGLGG LGIEIDDALNSAKSDEPRLI  
422 STPDSRVTVLVVP TNEELAIARACVGVV\*

423 **G3PD<sub>Ec</sub>-NOX<sub>Ca</sub>**

424 MGSSHHHHHHSSGLVPRGSHMNQRNASMTVIGAGSYGTALAITLARNGHEVV LWGHDPEHIATLERDR  
425 CNA AFLPDVFPFDTLHLES DLATALAASRNILVVVPSHVFG EVLRQIKPLMRPDARLVWATKGLEAET  
426 GRLLQDVAREALGDQIPLAVISGPTFAKELAAGLPTAISLASTDQTFADDLQQLLHCGKSF RVYSNPD  
427 FIGVQLGGAVKNVIAIGAGMSDGIGFGANARTALITRGLAEMSRLGAALGADPATFMGMAGLGD LVLT  
428 CTDNQSRNRRFGMMLGQGMDVQSAQEKIGQVVEGYRNTKEVRELAHRFGVEMPITEE IYQVLYCGKNA  
429 REAALTLLGRARKDERSSHGSSGSSGSSGSSGSSGSSMKIVVIGCTHAGTA AVKTI LKENPEAEITIF  
430 ERNDNISFLSCGIALYVGGVVKDPAGL FYSNPEELSKMGANV KIKHNVKSIDTKSKKVIAEDMNTGEE  
431 IEVSYDKLVNTTGSWPIIPPIPGIESKNILLCKNYDQANV IIRQTKDAKKIVIVGGGYIGIELVEAFQ  
432 KSGKQVTLIDGLDRILNKYLDKEFTDILED DLKKNGINLALDQCVKSFKANENGEVTSVETTKGEYEA  
433 DMVILCVGFRPNNEL LKGVDMLPNDAIIVDEYMRTSDPDI FAAGDSCAVHYNPNNGNYAYI PLATNAV  
434 RMGMLIGKNISTPKVKYRGTQSTSGLNLF GYNIGSTGVTVSGAPQIGLNVR SVIVKDN YRPEFMPTNE  
435 EIIMQLVYEVGTNRIVGGQVMSKYDITQSANTLSLAIQNKMTIEDLAYVDFFFQPHFDRPWN YLNILG  
436 LAALEQEGL\*

437 **GlpK<sub>Tk</sub>-AceK<sub>M5</sub>-E2<sub>Aa</sub>**

438 MGSSHHHHHHSSGLVPRGSHMEKFVLSLDEGTT SARAI I FDRESNIHGIGQYEFPPQHYPRPGWVEHNP  
439 EEIWD AQLRAIKDAIQSARIEPNQIAAIGVTNQRETTLVWDKDGKPLYNAIVWQCRRTAEMVEEIKRE  
440 YGTMIKEKTGLVDPDAYFSASKLKWLLDNVPGLEKAEKGEVMFGTVDTFLIYRLTGEHVTDYSNASRT  
441 MLFNIKKLDWDELLELFDIPESVLPEVRESSEVYGYTKKELLGAEIPVSGDAGDQQAALFGQAAFEA  
442 GMVKATYGTGSFILVNTDKMVLVSDNLLTTIAWGLNGRVSYALEGSI FVTGAAVQWLRDGIKIIKHAS

443 ETEELATKLESNEGVIYFVPAFVGLGAPYWDQFARGIIIGITRGTGREHLARATLEAIAYLTRDVVDEM  
444 EKLIVQIKELRVDGGATANDFLMQFQADILNRKVIRPVVKEETALGAAYLAGLAVDYWADTREIAELWK  
445 AERIFEPKMKDEKTRERLYKGWKEAVKRAMGWAKVVDSSAKSNGSSGSSGSSCGSSGSSGSSMTVLVVNS  
446 GSSSLKYAVVRPASGEFLADGIEEIGSGAVPDHDAALRAAFDELAAGLHLEDLCLKAVGHRMVHGG  
447 KTFYKPSVVDDELIAKARELSPLAPLHNPPAIKGI EVARKLLPDLPHIAVFDTAFFHDLPA PASTYAI  
448 DRELAETWHIKRYGFHGTSHEYVSQQAAIFLDRPLESLNQIVLHLGNGASASAVAGGKAVDTSMGLTP  
449 MEGLVMGTRSGDIDPGVIMYLWRTAGMSVDDIESMLNRRSGVLGLGGASDFRKLRELIESGDEHAKLA  
450 YDVYIHRRLKYIGAYMAVLGRTDVISFTAGVGENVPPVRRDALAGLGGGLGIEIDDALNSAKSDEPRLI  
451 STPDSRVTVLVVPNEELAIARACVGVVGTGSSGSSGSSGSSSMPLDPVIQQVLDQLNRMPAPDYKHLIS  
452 AQQFRSQQSLFPPVKKEPVAEVREFDMDLPGRTLKVRMYRPEGVEPPYPALVYYHGGGWVGDLETHD  
453 PVCRLAKDGRAVVSVDYRLAPEHKFPAAVEDAYDALQWIAERAADFHLDPARIAVGGDSAGGNLAA  
454 VTSILAKERGGPALAFQLLIYPSTGYDPAHPPASIEENAEGYLLTGMMMLWFRDQYLNLSLEELTHPWF  
455 SPVLYPDL SGLPPAYIATAQYDPLRDV GKLYAEALNKAGVKVEIENFEDLIHGFAQFYSLSPGATKAL  
456 VRIAEKLRDALA\*

457

458 **G3PD<sub>Ec</sub>-NOX<sub>Ca</sub>-Est2<sub>Aa</sub>**

459 MGSSHHHHHSSGLVPRGSHMNQRNASMTVIGAGSYGTALAITLARNGHEVVLWGHDP EHIATLERDR  
460 CNA AFLPDVFPD TLHLESDLATALAASRNILVVVPSHVFG EVLRQIKPLMRPDARLVWATKGLEAET  
461 GRLQLQDVAREALGDQIPLAVISGPTFAKELAAGLPTAISLASTDQTFADDLQQLLHCGKSFRVYSNPD  
462 FIGVQLGGAVKNVIAIGAGMSDGIGFGANARTALITRGLAEMSRLGAALGADPATFMGMAGLGDVLVT  
463 CTDNQSRNRRFGMMLGQGM DVQSAQEKIGQVVEGYRNTKEVRELAHRFGVEMPITEEIIYQVLYCGKNA  
464 REAALTLLGRARKDERSSHGTSGSSGSSCGSSGSSGSSMKIVVIGCTHAGTAAVKTILKENPEAEITI  
465 FERNDNISFLSCGIALYVGGVVKDPAGLFYSNPEELSKMGANVKIKHNVKSIDTKSKK VIAEDMNTGE  
466 EIEVS YDKLVNTTGSWPIIPPIPGIESKNILLCKNYDQANVIIRQTKDAKKIVIVGGGYIGIELVEAF  
467 QKSGKQVTLIDGLDRILNKYLDKEFTDILEDLKKNGINLALDQCVKSFKANENGEVTSVETTKGEYE  
468 ADMVILCVGFRPNNELLLKGVDM LPNDAIIVDEYMRTSDPDI FAAGDSCAVHYNPNGNYAYIPLATNA  
469 VRMGMLIGKNISTPKVKYRGTQSTSGLNLF GYNIGSTGVTVSGAPQIGLNVR SVIVKDNYP EFMP TN  
470 EEIIMQLVYEVGTNRIVGGQVMSKYDITQSANTLSLAIQNKMTIEDLAYVDFFFQPHFDRPWN YLNIL  
471 GLAALEQEGLGSSSMPLDPVIQQVLDQLNRMPAPDYKHLISAQQFRSQQSLFPPVKKEPVAEVREFDMDL  
472 PGRTLKVRMYRPEGVEPPYPALVYYHGGGWVGDLETHDPVCRVLAKDGRAVVSVDYRLAPEHKFP A  
473 AVEDAYDALQWIAERAADFHLDPARIAVGGDSAGGNLAAVTSILAKERGGPALAFQLLIYPSTGYDPA  
474 HPPASIEENAEGYLLTGMMMLWFRDQYLNLSLEELTHPWFSPVLYPDL SGLPPAYIATAQYDPLRDV GK  
475 LYAEALNKAGVKVEIENFEDLIHGFAQFYSLSPGATKALVRIAEKLRDALA\*

476

477 **FruA<sub>Sc</sub>-Est2<sub>Aa</sub>**

478 MGSSHHHHHSSGLVPRGSHMKILAITSCPNGIAHTYMAQEKLEQAAKEMGVDIKVETQGGVGAENVL  
479 TAKEIREADGIIIAADRQVDLSRFNGKRLINENVREGIHHPKELIQRIIDQNAPIHHEKGASDND SYE

480 EEEKKSGVQMVYQHLMNGVSFMVPPFIVVGGLLIAIALTLGGEPSAKGLVIPDDSFWKSIEKIGALSFS  
481 FMVPILAGYIAYSIAADKPLVPGMIGGAIADGSEAGAGFLGGIVAGFLAGYIAKWIKNVKVPK  
482 AMAPIMPIIIPIISSVIVGLIFIFLIGAPISGIFTALTGWLKGQGANIVLALIIGAMIAFDMGGP  
483 VNKVAFVFLGSAALIAEGNYAVMGMVAVAVCTPPIGLGLATFLQKGFNNSEQEMGKASFTMGLFGITEG  
484 AIPFAAQDPLRIIPANMIGAMVAAVIAALGGVGDRAVHGGPIVAVLGGIQHVLWFFVAVIIGSLITMF  
485 TVLLFKKNTPVAVLEGEVVEDGIGDQSHSNNQVAESRTENNEQKDDDSVFHKDLIELRQESMQRDN  
486 AIDQLEKLDAGYIESLDKVKEAVLQREAEETTAIGMNVAI PHAKSDAVKQPAVAVLQDKQGI EWES  
487 LDGTS PKIVFLIVPNNNDTHLKLQLSRALMDETTRENLINATTKDEIYNILKMIGSMPLDPVIQ  
488 QVLDQLNRMPAPDYKHLSAQQFRSQQLFPPVKKEPVAEVREFDMDLPGRTLKVRMYRPEGVEPPYPA  
489 LVYYHGGGWVVDLETHDPVCRVLAKDGRAVVSVDYRLAPEHKFPAAVEDAYDALQWIAERAADFHL  
490 DPARIAVGGDSAGGNLAAVTSILAKERGGPALAFQLLIYPSTGYDPAHPPASIEENAEGYLLTGMMML  
491 WFRDQYLNSLEELTHPWFSPVLYPDL SGLPPAYIATAQYDPLRDV GGLYAEALNKAGVKVEIENFEDL  
492 IHGFAQFYSLSPGATKALVRIA EKLRDALA\*

493

## 494 **Protein Expression and Purification**

495

### 496 **Expression of individual enzymes and bi-enzymatic fusion proteins.**

497 The expression plasmids outlined above were used to transform *E. coli* BL21 DE3 Star (Invitrogen,  
498 ThermoFisher Scientific, USA), using Luria agar containing 100  $\mu\text{g mL}^{-1}$  ampicillin as a selective growth  
499 medium. Cells were cultured overnight in Luria broth containing 100  $\mu\text{g mL}^{-1}$  ampicillin at 37 °C and  
500 shaken at 200 rpm, then induced for 2, 4, 6 and 24 h with either arabinose or isopropyl  $\beta$ -D-1-  
501 thiogalactopyranoside (IPTG) at 0.2 M and 1 mM final concentration, respectively (see Supplementary  
502 Table 1 for details). Cultures were then harvested, by centrifugation at 8000 g, resuspended in one  
503 tenth culture volume of resuspension buffer (50 mM Tris-Cl, 250 mM NaCl, pH 7.5) and lysed with  
504 Bugbuster™ (Novagen). Protein expression was analyzed by SDS-PAGE separation (4-12% Bolt Bis-Tris  
505 Plus Polyacrylamide Gel with MES SDS running buffer (Invitrogen, USA) and visualized with NuBlue  
506 (Novagen). The optimal expression time (Supplementary Table 1) was selected and large scale  
507 expression cultures of 1-2 L prepared in the same way as above except that cells were lysed by passage  
508 through an EmulsiFlex-C5 cell homogenizer (Avestin) at 20,000 psi, 4 °C and cellular debris removed  
509 by centrifugation (40,000 x g, 15 min, 4 °C). Protein was first purified from cell free lysates by IMAC  
510 purification of HIS-tagged protein by elution with resuspension buffer (50 mM Tris-Cl, 250 mM NaCl,  
511 pH 7.5) containing increasing concentration of imidazole from NiNTA-sepharose (Hi5 HIS-TRAP, GE  
512 Healthcare). The desired protein fractions were then pooled and further purified using a Superdex 200  
513 size exclusion column (GE Healthcare). Pooled fractions were then concentrated and stored at 4 °C, or  
514 - 80 °C, as required.

515

516 **Supplementary Table 1. Optimal recombinant expression conditions for the individual enzymes and**

517 **multi-enzyme fusions comprising each nanomachine.**

| Enzyme                                                     | Construct | Expression Vector    | Host Cells                              | Inducer; Temperature (°C) and Time [h] |
|------------------------------------------------------------|-----------|----------------------|-----------------------------------------|----------------------------------------|
| <b>Phosphotransfer Nanomachine Proteins</b>                |           |                      |                                         |                                        |
| GlpK <sub>TK</sub>                                         | pCJH1     | pETCC2               | <i>E.coli</i> BL21DE3 Star (Invitrogen) | 1mM IPTG; 37°C, 18h                    |
| AceK <sub>Ms</sub>                                         | pCJH2     | pDEST17 (Invitrogen) | <i>E.coli</i> BL21AI (Invitrogen)       | 20mM arabinose 15°C, 18h               |
| GlpK <sub>TK</sub> -AceK <sub>Ms</sub>                     | pCJH3     | pETCC2               | <i>E.coli</i> BL21DE3 Star (Invitrogen) | 1mM IPTG; 37°C, 18h                    |
| GlpK <sub>TK</sub> -AceK <sub>Ms</sub> -Est2 <sub>Aa</sub> | pCJH4     | pETCC2               | <i>E.coli</i> BL21DE3 Star (Invitrogen) | 1mM IPTG; 37°C, 18h                    |
| <b>Oxidation Nanomachine Proteins</b>                      |           |                      |                                         |                                        |
| G3PD <sub>Ec</sub>                                         | pCJH5     | pDEST17 (Invitrogen) | <i>E.coli</i> BL21AI (Invitrogen)       | 20mM arabinose 25°C, 18h               |
| NOX <sub>Ca</sub>                                          | pCJH6     | pETCC2               | <i>E.coli</i> BL21DE3 Star (Invitrogen) | 1mM IPTG; 37°C, 18h                    |
| G3PD <sub>Ec</sub> -NOX <sub>Ca</sub>                      | pCJH7     | pETCC2               | <i>E.coli</i> BL21DE3 Star (Invitrogen) | 1mM IPTG; 25°C, 18h                    |
| G3PD <sub>Ec</sub> -NOX <sub>Ca</sub> -Est2 <sub>Aa</sub>  | pCJH8     | pETCC2               | <i>E.coli</i> BL21DE3 Star (Invitrogen) | 1mM IPTG; 25°C, 18h                    |
| <b>Aldol addition Nanomachine Proteins</b>                 |           |                      |                                         |                                        |
| FruA <sub>Sc</sub>                                         | pAF1      | pRSET-A (Invitrogen) | <i>E.coli</i> BL21DE3                   | 1mM IPTG; 15°C, 18h                    |
| FruA <sub>Sc</sub> -Est2 <sub>Aa</sub>                     | pCJH9     | pETCC2               | <i>E.coli</i> BL21DE3 Star (Invitrogen) | 1mM IPTG; 15°C, 18h                    |
| <b>Esterase Conjugation Domain Protein</b>                 |           |                      |                                         |                                        |
| Est2 <sub>Aa</sub>                                         | pCJH10    | pETCC2               | <i>E.coli</i> BL21DE3 Star (Invitrogen) | 1mM IPTG; 37°C, 18h                    |

518

519 Each of the purified individual and bi-enzymatic fusion proteins were then characterised in terms of

520 catalytic activity (Table 1), thermostability and oligomeric structure (Supplementary Table 2) to ensure

521 suitability for incorporation into the final nanomachine constructs with the esterase conjugation

522 domain, utilising the enzymatic activity assays and analytical methods outlined below. Further specific

523 details regarding the expression and purification of the final three nanomachine multi-enzyme fusion

524 proteins used to construct the nanofactory is given below.

525

526 **Supplementary Table 2. Biochemical characterization of the individual enzymes and multi-enzyme**

527 **fusions comprising each nanomachine.**

|                                                            | <b>Optimal<br/>Reaction pH<br/>(pH range)</b> | <b><math>T_{50}^*</math><br/>(°C)</b> | <b>Oligomeric Structure</b> | <b><math>k_{cat}/K_M</math><br/>(<math>s^{-1} M^{-1}</math>)</b> | <b>Reference</b>           |
|------------------------------------------------------------|-----------------------------------------------|---------------------------------------|-----------------------------|------------------------------------------------------------------|----------------------------|
| <b>Glycerol phosphorylation</b>                            |                                               |                                       |                             |                                                                  |                            |
| GlpK <sub>TK</sub>                                         | 8.0 (6.5-9.5)                                 | > 100                                 | monomer                     | $6.1 \times 10^7$                                                | <sup>27</sup> ; This study |
| GlpK <sub>TK</sub> -AceK <sub>MS</sub>                     |                                               | 58                                    | dimer                       | $7.7 \times 10^7$                                                | This study                 |
| GlpK <sub>TK</sub> -AceK <sub>MS</sub> -Est2 <sub>Aa</sub> |                                               | 59                                    | monomer/hexamer             | $8.6 \times 10^7$                                                | This study                 |
| <b>Acetate dephosphorylation (ADP phosphorylation)</b>     |                                               |                                       |                             |                                                                  |                            |
| AceK <sub>MS</sub>                                         | 7.4 (6.0-8.5)                                 | 52                                    | homodimer                   | $2.8 \times 10^6$                                                | <sup>28</sup> ; This study |
| GlpK <sub>TK</sub> -AceK <sub>MS</sub>                     |                                               | 50                                    | dimer                       | $5.4 \times 10^5$                                                | This study                 |
| GlpK <sub>TK</sub> -AceK <sub>MS</sub> -Est2 <sub>Aa</sub> |                                               | 63                                    | monomer/hexamer             | $9.1 \times 10^5$                                                | This study                 |
| <b>Glycerol-3-phosphate oxidation</b>                      |                                               |                                       |                             |                                                                  |                            |
| G3PD <sub>Ec</sub>                                         | 9.0 (8.0-9.5)                                 | 51                                    | monomer                     | $1.4 \times 10^6$                                                | <sup>18</sup> ; This study |
| G3PD <sub>Ec</sub> -NOX <sub>Ca</sub>                      |                                               | 37                                    | dimer                       | $1.8 \times 10^4$                                                | This study                 |
| G3PD <sub>Ec</sub> -NOX <sub>Ca</sub> -Est2 <sub>Aa</sub>  |                                               | 45                                    | dimer                       | $1.1 \times 10^4$                                                | This study                 |
| <b>Oxygen reduction (NADH oxidation)</b>                   |                                               |                                       |                             |                                                                  |                            |
| NOX <sub>Ca</sub>                                          | 7.0 (7.0-9.0)                                 | 37                                    | homodimer                   | $4.9 \times 10^6$                                                | <sup>29</sup> ; This study |
| G3PD <sub>Ec</sub> -NOX <sub>Ca</sub>                      |                                               | 37                                    | dimer                       | $6.2 \times 10^6$                                                | This study                 |
| G3PD <sub>Ec</sub> -NOX <sub>Ca</sub> -Est2 <sub>Aa</sub>  |                                               | 37                                    | dimer                       | $4.6 \times 10^6$                                                | This study                 |
| <b>Aldol addition</b>                                      |                                               |                                       |                             |                                                                  |                            |
| FruA <sub>Sc</sub>                                         | 6.5-9.0                                       | > 95                                  | monomer                     | $3.2 \times 10^4$                                                | <sup>30</sup>              |
| FruA <sub>Sc</sub> -Est2 <sub>Aa</sub>                     |                                               | 81                                    | monomer                     | $1.3 \times 10^5$                                                | This study                 |
| <b>Esterase<sup>1</sup></b>                                |                                               |                                       |                             |                                                                  |                            |
| Est2 <sub>Aa</sub>                                         | 7.1 (5.5-8.0)                                 | 80                                    | monomer                     | $8.3 \times 10^5$                                                | <sup>31</sup> ; This study |

528 \*  $T_{50}$  the temperature at which, after 30 min of incubation, 50% of the initial enzyme activity remains. The  $T_{50}$   
529 values are the averages of at least three independent assays. Standard deviations were below 1.0 °C in all cases.  
530 pH optima did not vary between individual and fusion enzymes.

531

### 532 **Expression of GlpK<sub>TK</sub>-AceK<sub>MS</sub>-E2<sub>Aa</sub>.**

533 The expression of GlpK<sub>TK</sub>-AceK<sub>MS</sub>-E2<sub>Aa</sub> in *E. coli* BL21 DE3 Star (Invitrogen, ThermoFisher Scientific, USA)  
534 cells transformed with the plasmid pETCC2- GlpK<sub>TK</sub>-AceK<sub>MS</sub>-E2<sub>Aa</sub> (pCJH4; Supplementary Table 1) was  
535 examined after induction at 15 °C for 18 h with 1 mM IPTG as inducer, and the oligomeric state related  
536 to fusion protein activity, using glycerol kinase activity as a proxy for all three activities (Supplementary  
537 Figure 2). Although all three oligomeric states isolated by gel filtration purification (Superdex 150 gel  
538 filtration column, GE Healthcare, after pooling HIS-tagged purification pools from a 5 mL HisTrap FF

539 column, GE Healthcare) demonstrated glycerol kinase activity, the maximum specific activity per  
540 milligram of protein was retained in the “monomeric-dimeric” fraction (Supplementary Figure 2). For  
541 subsequent experiments, the monomeric-dimeric fraction was isolated.

542

543 For large scale preparation of GlpK<sub>TK</sub>-AceK<sub>MS</sub>-E2<sub>Aa</sub> fusion protein pCH4 was transformed into *E. coli*  
544 BL21DE3 Star cells. Cells were cultured in Luria broth overnight at 37 °C with shaking at 200 rpm,  
545 diluted to OD<sub>600nm</sub> 0.7 in Luria broth and induced at 15 °C for 18 h with arabinose and IPTG (20 mM  
546 and 1 mM final concentration, respectively) and then harvested, washed in one tenth volume  
547 resuspension buffer (50 mM Tris-Cl, 250 mM NaCl, pH 7.5) and cell pellets stored at -20 °C. Cell paste  
548 (8 g) was resuspended in 200 mL 50 mM Tris, 300 mM NaCl pH 8 containing 0.5 mg mL<sup>-1</sup> lysozyme  
549 (Sigma–Aldrich), 2 mM PMSF (Sigma–Aldrich), four EDTA-Free Complete Protease inhibitor tablets  
550 (Roche) and 1000 Units Benzonase (Merck Millipore). Following resuspension, the cells were ruptured  
551 by passage three times through an EmulsiFlex-C5 cell homogenizer (Avestin) at 15,000 psi at 4 °C and  
552 cellular debris removed by centrifugation (40,000 x *g*, 15 min, 4 °C). The lysate was filtered (0.45 µm)  
553 and one quarter applied to a 5 mL HisTrap FF column (GE Healthcare) equilibrated in 50 mM Tris, 300  
554 mM NaCl pH 8 containing 0.1 mM tris-(2-carboxyethyl)phosphine (TCEP). The column was washed  
555 with 40 mM imidazole in the same buffer then the bound protein eluted with 300 mM imidazole in  
556 the same buffer. The eluted protein was analyzed by gel filtration on a Superdex 200 1030 gel filtration  
557 column (GE Healthcare) equilibrated with phosphate buffered saline with the absorbance of the  
558 eluted protein monitored at 280 nm and the esterase activity in the eluted fractions determined. For  
559 comparison, 0.5 mL of crude lysate was also subjected to gel filtration analysis, with monitoring at 280  
560 nm and analysis of esterase activity in the fractions.

561

## 562 **Expression and purification of G3PD<sub>Ec</sub>-NOX<sub>Ca</sub>-Est2<sub>Aa</sub>.**

563

564 Briefly, *E. coli* BL21 DE3 Star (Invitrogen) cells expressing G3PD<sub>Ec</sub>-NOX<sub>Ca</sub>-Est2<sub>Aa</sub> (pCJH8, Supplementary  
565 Table 1) were cultured in an XRS 20 bioreactor (Pall Corporation, USA) using a 2 litre volume of M9  
566 minimal medium, with 1% (w/v) ammonium sulphate and 1% (w/v) glucose as nitrogen and carbon  
567 source respectively and supplemented with 100 µg mL<sup>-1</sup> ampicillin. After initial growth at 37 °C, the  
568 temperature was reduced to 25 °C prior to induction, when the OD<sub>600nm</sub> reached 2.2. The optical  
569 density of the culture at induction was OD<sub>600nm</sub> 2.9 and 1.6 mL of 20% arabinose and IPTG to 1 mM  
570 were added to induce. The glucose feed was started 7 h post-induction to maintain 1% glucose and  
571 cells were harvested 22 h post-induction, when OD<sub>600nm</sub> was 21.6.

572

573 Cell paste (2 g) was resuspended in 50 mL 50 mM Tris, 300 mM NaCl pH 8 containing 0.1 mM Tris-(2-  
574 carboxyethyl)phosphine (TCEP; Sigma-Aldrich), 0.5 mg mL<sup>-1</sup> lysozyme (Sigma-Aldrich), 2 mM  
575 phenylmethane sulfonyl fluoride (PMSF; Sigma-Aldrich), one EDTA-Free Complete Protease inhibitor  
576 tablet (Roche) and 250 Units Benzonase (Merck Millipore). Following resuspension, the cells were  
577 ruptured by passage three times through an EmulsiFlex-C5 cell homogenizer (Avestin) at 15,000 psi at  
578 4 °C and cellular debris removed by centrifugation (40,000 x *g*, 15 min, 4 °C). The lysate was filtered  
579 (0.45 µm) and applied to a 5 mL HisTrap FF column (GE Healthcare) equilibrated in 50 mM Tris, 300  
580 mM NaCl pH 8 containing 0.1 mM TCEP. The column was washed with 40 mM imidazole in the same  
581 buffer then the bound protein eluted with 300 mM imidazole in the same buffer. The eluted protein  
582 was subjected to gel filtration on a Superdex 200 gel filtration column (GE Healthcare) equilibrated  
583 with 50 mM citrate, 200 mM NaCl pH 6 containing 1 mM TCEP with the absorbance of the eluted  
584 protein monitored at 280 and 450 nm. Fractions eluting from 158 – 192 mL were pooled and  
585 concentrated to 0.94 mg mL<sup>-1</sup>.

586 G3PD<sub>Ec</sub>-NOX<sub>Ca</sub>-Est2<sub>Aa</sub> eluted in a broad peak from the gel filtration column, with some protein eluting  
587 in the void volume (Supplementary Figure 2). The final pool was > 95% pure as estimated by SDS-PAGE  
588 and was found to have specific activities of 16 U mg<sup>-1</sup> for esterase and 31 U mg<sup>-1</sup> for NADH oxidase.  
589

### 590 **Expression and purification of FruA<sub>Sc</sub>-Est2<sub>Aa</sub>.**

591 FruA<sub>Sc</sub> was selected as the preferred aldolase for the nanofactory based on its enantioselectivity (3S,  
592 4R-ADHOP), oligomeric structure, stability, catalytic rate (Supplementary Table 2) and previous  
593 success using this enzyme in multi-enzyme cascades to produce similar chiral sugars<sup>18</sup>.

594 For the preparation of the aldol addition nanomachine, we constructed genetic fusions between Fru<sub>Sc</sub>  
595 and E2<sub>Aa</sub> as illustrated in Supplementary Figure 1. Purified Fru<sub>Sc</sub>-E2<sub>Aa</sub> was obtained by expression and  
596 purification from *E. coli* BL21 DE3 Star cells (Invitrogen, Thermofisher Scientific). Briefly, a synthetic  
597 gene encoding FruA<sub>Sc</sub>-E2<sub>Aa</sub> was transferred into pETCC2 (pCJH10, Supplementary Table 1) and used to  
598 transform *E. coli* BL21DE3 Star (Invitrogen) cells. Cells were cultured in Luria broth overnight at 37 °C  
599 with shaking at 200 rpm, diluted to OD<sub>600nm</sub> 0.7 in Luria broth and induced for 18 h with arabinose and  
600 IPTG (20 mM and 1 mM final concentration, respectively). The cells were then harvested, washed in  
601 one tenth volume resuspension buffer (50 mM Tris-Cl, 250 mM NaCl, pH 7.5) and cell pellets stored at  
602 -20 °C. Cell paste (8 g) was resuspended in 200 mL 50 mM Tris, 300 mM NaCl pH 8 containing, 0.5 mg  
603 mL<sup>-1</sup> lysozyme (Sigma-Aldrich), 2 mM PMSF (Sigma-Aldrich), four EDTA-Free Complete Protease  
604 Inhibitor tablets (Roche) and 1000 Units Benzonase (Merck Millipore). Following resuspension, the  
605 cells were ruptured by passage three times through an EmulsiFlex-C5 cell homogenizer (Avestin) at  
606 15,000 psi and 4 °C and cellular debris removed by centrifugation (40,000 x *g*, 15 min, 4 °C). The lysate



607 was filtered (0.45  $\mu\text{m}$ ) and applied to a 5 mL HisTrap FF column (GE Healthcare) equilibrated in 50 mM  
608 Tris, 300 mM NaCl pH 8 containing 0.1 mM TCEP. The column was washed with 40 mM imidazole in  
609 the same buffer then the bound protein eluted with 300 mM imidazole in the same buffer. The eluted  
610 protein was analyzed by gel filtration on a Superdex 200/1030 gel filtration column (GE Healthcare)  
611 equilibrated with phosphate buffered saline with the absorbance of the eluted protein monitored at  
612 280 nm (Supplementary Figure 2) and the esterase activity in the eluted fractions determined.

613

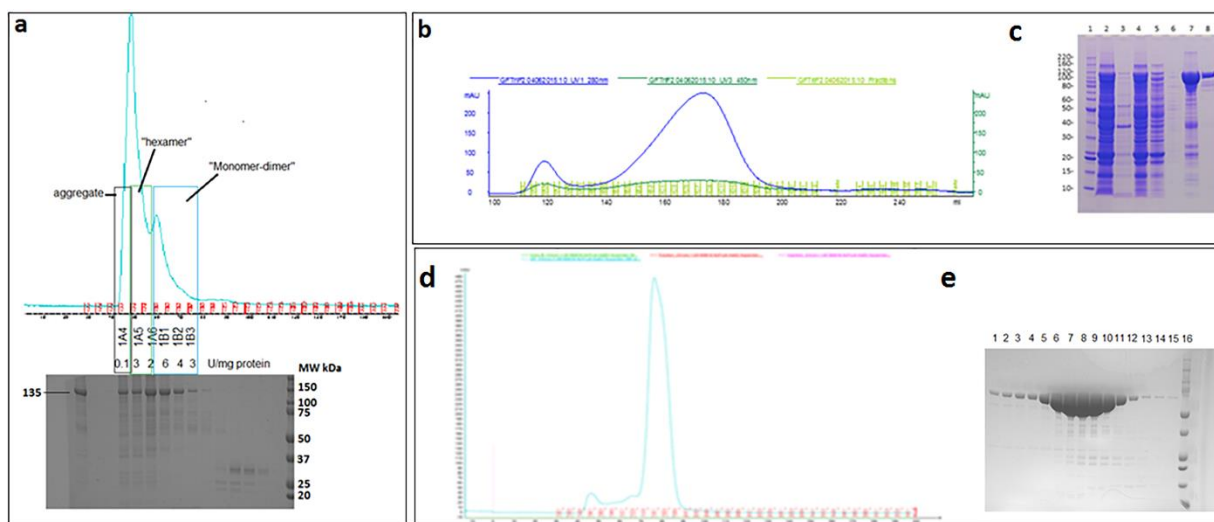

614

615 **Supplementary Figure 2. Expression and purification of nanomachine fusion proteins.** **a**, Size  
616 exclusion fractionation of HIS-tag purified recombinant GlpK<sub>TK</sub>-AceK<sub>MS</sub>-E2<sub>Aa</sub> multi-enzyme fusion  
617 protein was used to estimate oligomeric state and associated specific activity after induction with  
618 1 mM IPTG at 15 °C for 24 h. **b**, Size exclusion fractionation of HIS-tag purified recombinant G3PD<sub>EC</sub>-  
619 NOX<sub>Ca</sub>-Est2<sub>Aa</sub>. Fractions from 158 – 192 mL were pooled to avoid higher MW aggregate. **c**, SDS-PAGE  
620 analysis of G3PD<sub>EC</sub>-NOX<sub>Ca</sub>-Est2<sub>Aa</sub> purification. Lane 1 Benchmark<sup>TM</sup> protein molecular weight  
621 standard (Invitrogen), Lane 2 whole cells, Lane 3 pellet after centrifugation of lysate, Lane 4 lysate,  
622 Lane 5 HisTrap unbound, Lane 6 40 mM imidazole wash, Lane 7 300 mM imidazole elution, Lane 8 gel  
623 filtration pool. **d**, Size exclusion fractionation profile of HIS-tag purified recombinant FruA<sub>Sc</sub>-Est2<sub>Aa</sub>. **e**,  
624 SDS-PAGE analysis of FruA<sub>Sc</sub>-Est2<sub>Aa</sub> purification. Lane 1 Fraction 1B1, Lanes 2-15 fractions 1C1 to 2A3,  
625 Lane 16 Dual<sup>TM</sup> Protein molecular weight standard (NEB).

626

## 627 Cofactor modification

628

### 629 Synthesis of N<sup>6</sup>-2AE-ADP.

630 Adenosine-5'-phosphate sodium salt, ADP.xNa, (0.5 g, 1.13 mmol) was dissolved in distilled deionised  
631 (DI) water (1.5 mL) and ethyleneimine (160  $\mu\text{L}$ ) was added very slowly. During the addition of the  
632 ethyleneimine, the pH was carefully adjusted with perchloric acid to keep it within the pH range of

633 2.0-4.0. The pH at the end was left at 3.2. The reaction was stirred at room temperature for ~50 h. The  
634 solvent was then evaporated in a fume-hood under a stream of nitrogen. The crude residue was  
635 dissolved in DI water (10 mL) and the pH adjusted to 5.6 by the addition of lithium hydroxide (LiOH;  
636 saturated aq. solution) and heated at 35 °C for 80 h. The solution was lyophilized to yield crude *N*<sup>6</sup>-  
637 2AE-ADP (Supplementary Scheme 1).

638

#### 639 **Synthesis of MAL-PEG<sub>24</sub>-2AE-ADP.**

640 Crude *N*<sup>6</sup>-2AE-ADP DIPEA salt (100 mg, crude estimate equivalent to about 13.7 mmol pure 2AE-ADP)  
641 was dissolved in 50% acetonitrile/phosphate buffered saline pH 7.0 (3.0 mL) and a solution of MAL-  
642 PEG<sub>24</sub>-NHS (43.0 mg) was added and stirred at room temperature overnight (Supplementary Scheme  
643 1). The mixture was purified by pHPLC and lyophilised to yield pure MAL-PEG<sub>24</sub>-2AE-ADP (12.2 mg).

644

#### 645 **Synthesis of *N*<sup>6</sup>-2AE-NAD<sup>+</sup>.**

646 To a solution of β-nicotinamide adenine dinucleotide hydrate, NAD<sup>+</sup>, (1.0 g, 1.51 mmol) dissolved in  
647 2 mL deionized water was added dropwise ethyleneimine (4.25 mmol) with the solution maintained  
648 at a pH of 3.2 with the addition of 70% perchloric acid. The reaction mixture was stirred at room  
649 temperature for 50 h with the pH maintained from 2-3, before the addition of 1.75 mL deionized water  
650 to solubilise precipitate. The product was precipitated by the addition of ice-cold ethanol and the  
651 precipitate washed with ethanol. The resulting mix of *N*<sup>1</sup>-2AE-NAD<sup>+</sup> and NAD<sup>+</sup> was dissolved in water  
652 (10 mL) and adjusted to pH 6.5 with 0.1 M LiOH. The solution was stirred at 50 °C for 7 h with the pH  
653 maintained at 6.5 before being lyophilized to yield the product, as a mixture of *N*<sup>6</sup>-2AE-NAD<sup>+</sup> and NAD<sup>+</sup>  
654 (Supplementary Scheme 1).

655

#### 656 **Synthesis of MAL-PEG<sub>24</sub>-2AE-NAD<sup>+</sup>.**

657 To a stirred solution of *N*<sup>6</sup>-2AE-NAD<sup>+</sup>/NAD<sup>+</sup> (14.7 mg mix, approximately 0.0104 mmol *N*<sup>6</sup>-2AE-NAD<sup>+</sup>)  
658 in phosphate buffered saline (PBS; pH 7.4, 1.0 mL) was added a solution of MAL-PEG<sub>24</sub>-NHS (17.4 mg,  
659 0.0124 mmol) in PBS (1 mL). The solution was stirred at room temperature overnight (Supplementary  
660 Scheme 1). The mixture was analyzed by HPLC (0→50% CH<sub>3</sub>CN + 0.1% TFA over 18 min). Rt 17.8 min  
661 ESI+ found 662.62 (M/3, calcd 662.65) and 993.42 (M/2, calcd 993.98). The mixture was purified by  
662 preparative HPLC and fractions at Rt 17.8 min combined and lyophilized to yield pure MAL-PEG<sub>24</sub>-2AE-  
663 NAD<sup>+</sup> (5.4 mg, 26%).

664

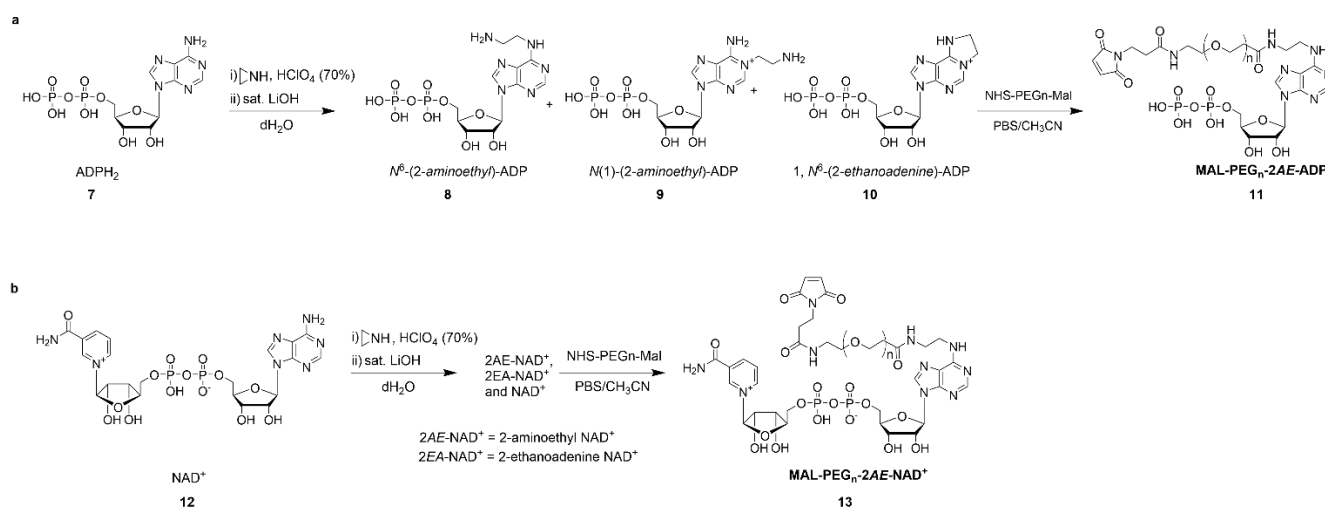

665

666 **Supplementary Scheme 1. Synthesis of modified cofactors for tethering to nanomachine fusion**  
 667 **proteins. a**, Scheme for synthesis of MAL-PEG<sub>n</sub>-2AE-ADP (**11**) from ADP (**7**). **b**, Scheme for synthetic  
 668 route to prepare MAL-PEG<sub>n</sub>-2AE-NAD<sup>+</sup> (**13**) from NAD<sup>+</sup> (**12**).

669

## 670 Cofactor attachment

671

### 672 Tethering of MAL-PEG<sub>24</sub>-2AE-ADP to GlpK<sub>TK</sub>-AceK<sub>M5</sub>-Est2<sub>Aa</sub> in solution.

673 IMAC purified GlpK<sub>TK</sub>-AceK<sub>M5</sub>-Est2<sub>Aa</sub> was found to elute as high molecular weight protein and in PBS  
 674 (Supplementary Figure 2). The IMAC purified protein was treated with TCEP (0.1 mM) then reacted  
 675 with 10 equivalents of MAL-PEG<sub>24</sub>-2AE-ADP without removal of the TCEP and washed with PBS. The  
 676 tethered 2AE-ADP-PEG<sub>24</sub>-MAL-GlpK<sub>TK</sub>-AceK<sub>M5</sub>-Est2<sub>Aa</sub> was found to convert 10 mM glycerol and 10 mM  
 677 acetyl phosphate to glycerol-3-phosphate with high efficiency (Supplementary Figure 3a).

678

### 679 Tethering of MAL-PEG<sub>24</sub>-2AE-NAD<sup>+</sup> to G3PD<sub>Ec</sub>-NOX<sub>Ca</sub>-Est2<sub>Aa</sub> in solution.

680 G3PD<sub>Ec</sub>-NOX<sub>Ca</sub>-Est2<sub>Aa</sub> was desalted into PBS containing 0 mM, 0.1 mM or 1 mM TCEP and reacted with  
 681 1–200 equivalents of MAL-PEG<sub>24</sub>-2AE-NAD<sup>+</sup>. The reaction mixtures were analyzed by SDS-PAGE and  
 682 the conjugate from one condition (0.1 mM TCEP, 200 equivalents TCEP) analyzed by mass  
 683 spectrometry. The tethered 2AE-NAD<sup>+</sup>-PEG<sub>24</sub>-MAL-G3PD<sub>Ec</sub>-NOX<sub>Ca</sub>-Est2<sub>Aa</sub> was found to convert 10 mM  
 684 glycerol-3-phosphate and to DHAP with high efficiency (Supplementary Figure 3b).

**a**

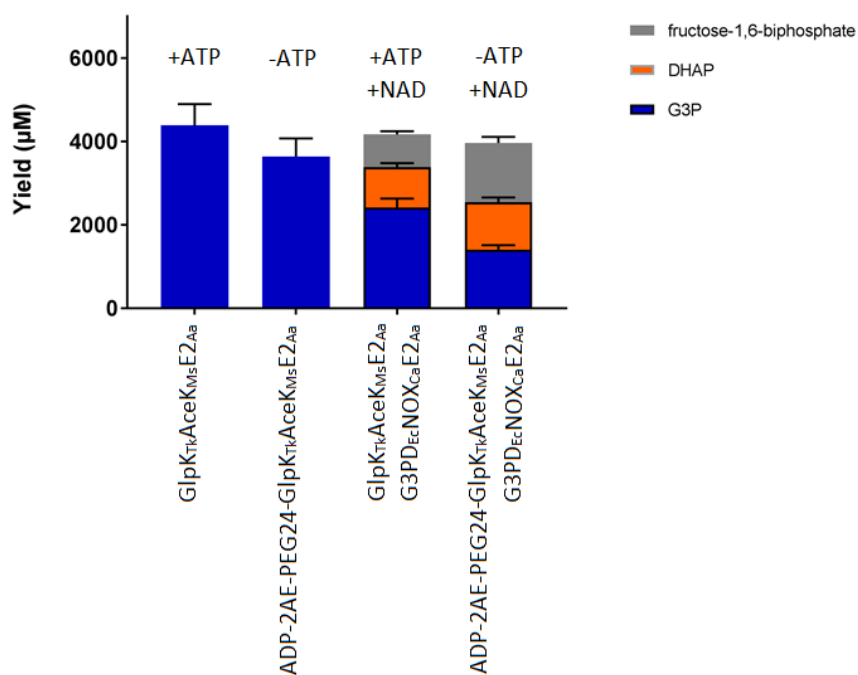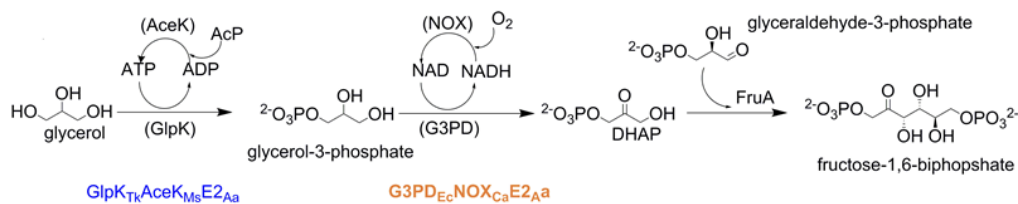

**b**

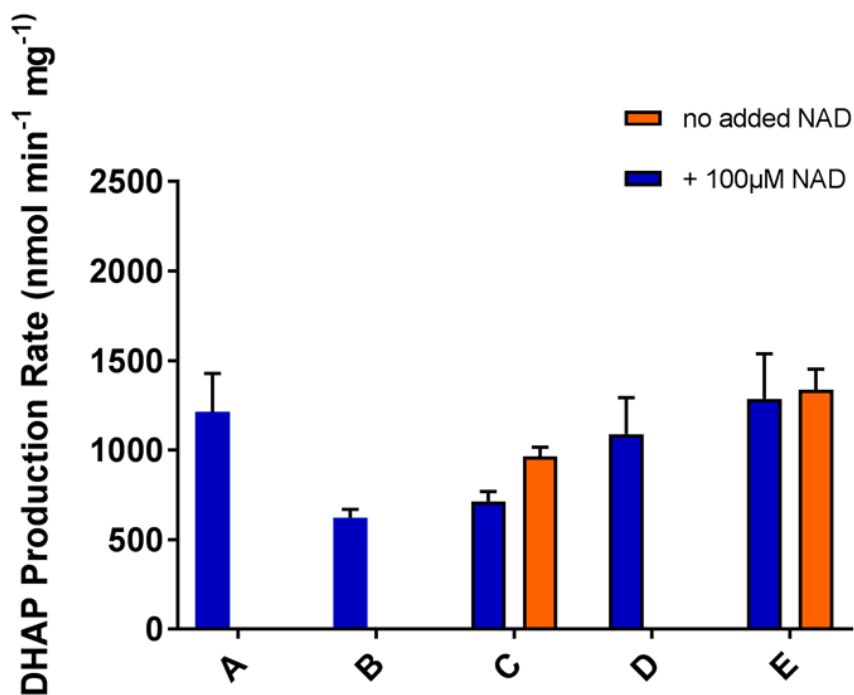

686 **Supplementary Figure 3. Functional tethering of modified cofactors MAL-PEG<sub>24</sub>-2AE-ADP (a) and**  
687 **MAL-PEG<sub>24</sub>-2AE-NAD<sup>+</sup> (b) to nanomachine fusion proteins. a,** Glycerolkinase activity with and without  
688 the addition of 100 μM ATP catalyzed by either 2AE-ADP-PEG<sub>24</sub>-MAL-GlpK<sub>TK</sub>-AceK<sub>M5</sub>-E2<sub>Aa</sub> or by GlpK<sub>TK</sub>-  
689 AceK<sub>M5</sub>-E2<sub>Aa</sub> was then coupled with glycerol-3-phosphate dehydrogenase activity (G3PD<sub>Ec</sub>-NOX<sub>Ca</sub>-E2<sub>Aa</sub>)  
690 and aldolase activity (FruA<sub>Sc</sub> with glyceraldehyde-3-phosphate as added donor substrate) to  
691 demonstrate the production of fructose-1,6-biphosphate from 10 mM glycerol using 2AE-ADP-PEG<sub>24</sub>-  
692 MAL-GlpK<sub>TK</sub>-AceK<sub>M5</sub>-E2<sub>Aa</sub>. A scheme of the three step reaction involved is illustrated beneath the graph.  
693 **b,** Glycerol-3-phosphate dehydrogenase activity (DHAP production rate) using 10 mM glycerol-3-  
694 phosphate with and without the addition of 100 μM NAD<sup>+</sup> catalyzed by 2AE-NAD<sup>+</sup>-PEG<sub>24</sub>-MAL-G3PD<sub>Ec</sub>-  
695 NOX<sub>Ca</sub>-E2<sub>Aa</sub> created under different reducing and tethering conditions: untethered control G3PD<sub>Ec</sub>-  
696 NOX<sub>Ca</sub>-E2<sub>Aa</sub> (A), 1 mM TCEP and 1 equivalent MAL-PEG<sub>24</sub>-2AE-NAD<sup>+</sup> (B), 0.1 mM TCEP and 1 equivalent  
697 MAL-PEG<sub>24</sub>-2AE-NAD<sup>+</sup> (C), no TCEP and 1 equivalent MAL-PEG<sub>24</sub>-2AE-NAD<sup>+</sup> (D), 1 mM TCEP and 5  
698 equivalent MAL-PEG<sub>24</sub>-2AE-NAD<sup>+</sup> (E). All reactions were conducted for 30 minutes at 37 °C, and  
699 products analysed by LCMS as described in analytical methods.

700

701 **Accurate mass determination of MAL-PEG<sub>24</sub>-2AE-NAD<sup>+</sup> tethered to G3PD<sub>Ec</sub>-NOX<sub>Ca</sub>-Est2<sub>Aa</sub> by**  
702 **LC-MS proteomics.**

703 The accurate mass of G3PD<sub>Ec</sub>-NAD<sub>teth</sub>-NOX<sub>Ca</sub>-Est2<sub>Aa</sub> conjugates was determined by denaturing liquid  
704 chromatography–mass spectrometry (LC-MS). Protein samples were spiked with formic acid (FA) to a  
705 final concentration of 0.1% (v/v) and separated by reverse-phased liquid chromatography on an  
706 UltiMate 3000 RSLC nano system (ThermoFisher Scientific) fitted with a 50 x 4.6 mm, 5 μM particle  
707 size, 300 Å pore size PLRP-S column (Agilent). Proteins were eluted at a flow of 250 μL min<sup>-1</sup> by applying  
708 a linear 30 min gradient from 0 to 80% solvent B (mobile phase A: 0.1% (v/v) formic acid; mobile phase  
709 B: 90% (v/v) acetonitrile/0.1% (v/v) formic acid) using an Apollo II electron spray ion source coupled  
710 to a microTOF-QII mass spectrometer (Bruker). The instrument was calibrated in positive ion mode  
711 using ESI-L Low Concentration Tuning Mix (Agilent) and LC-MS raw data were processed and  
712 deconvoluted using the MaxEnt algorithm as part of Bruker Compass DataAnalysis version 4.3.

713

714 **Sample preparation and peptide sequencing by nanoUPLC-MSMS**

715 G3PD<sub>Ec</sub>-NAD<sub>teth</sub>-NOX<sub>Ca</sub>-Est2<sub>Aa</sub> protein bands were manually excised from Coomassie-stained SDS-PAGE  
716 gels and subjected to manual in-gel reduction, alkylation and tryptic digestion. All gel samples were  
717 reduced with 10 mM DTT (Sigma) for 30 min, alkylated for 30 min with 50 mM iodoacetamide (Sigma)  
718 and digested with 375 ng trypsin gold (Promega) for 16 h at 37 °C. Peptides then were separated using  
719 an UltiMate 3000 RSLC nano system (ThermoFisher Scientific), utilizing a 60 min gradient on an  
720 Acclaim Pepmap 100 column (50 cm x 75 μm id with 3 μm particles). High-resolution MS/MS data was  
721 obtained on an Orbitrap Fusion Lumos Mass Spectrometer operated in data-dependent mode,

722 automatically switching between the acquisitions of a single Orbitrap MS scan (resolution, 120,000)  
723 every 3 s and the top-20 multiply charged precursors selected for EThcD fragmentation with a  
724 resolution of 30,000 for Orbitrap MS-MS scans.

725

## 726 **Mass spectra database searching**

727 Orbitrap MS/MS data was searched against a focused decoy database containing G3PD<sub>Ec</sub>-NOX<sub>Ca</sub>-Est2<sub>Aa</sub>  
728 and common contaminant protein sequences using the Byonic search engine (Protein Metrics) with  
729 tolerance of 5 ppm for precursor ions and 10 ppm for product ions. Enzyme specificity was tryptic and  
730 allowed for up to 2 missed cleavages per peptide. A Wildcard search with a range of +75 to +2200Da  
731 facilitated confident peptide identification (< 1% FDR) and spectrum counting of PEGylated cysteine  
732 residues. Variable modifications were set for NH<sub>2</sub>-terminal acetylation or protein N-termini, oxidation  
733 of methionine or tryptophan, and carbamidomethyl modification of cysteine.

734

735 All of the cysteine containing peptides from the tryptic digest were able to be observed by mass  
736 spectrometry in the unconjugated sample, but the conjugated sample was missing the peptide  
737 corresponding to the linker cysteine, and instead peptides corresponding to the conjugated peptide  
738 were observed (Supplementary Figure 4).

739

740

741

742

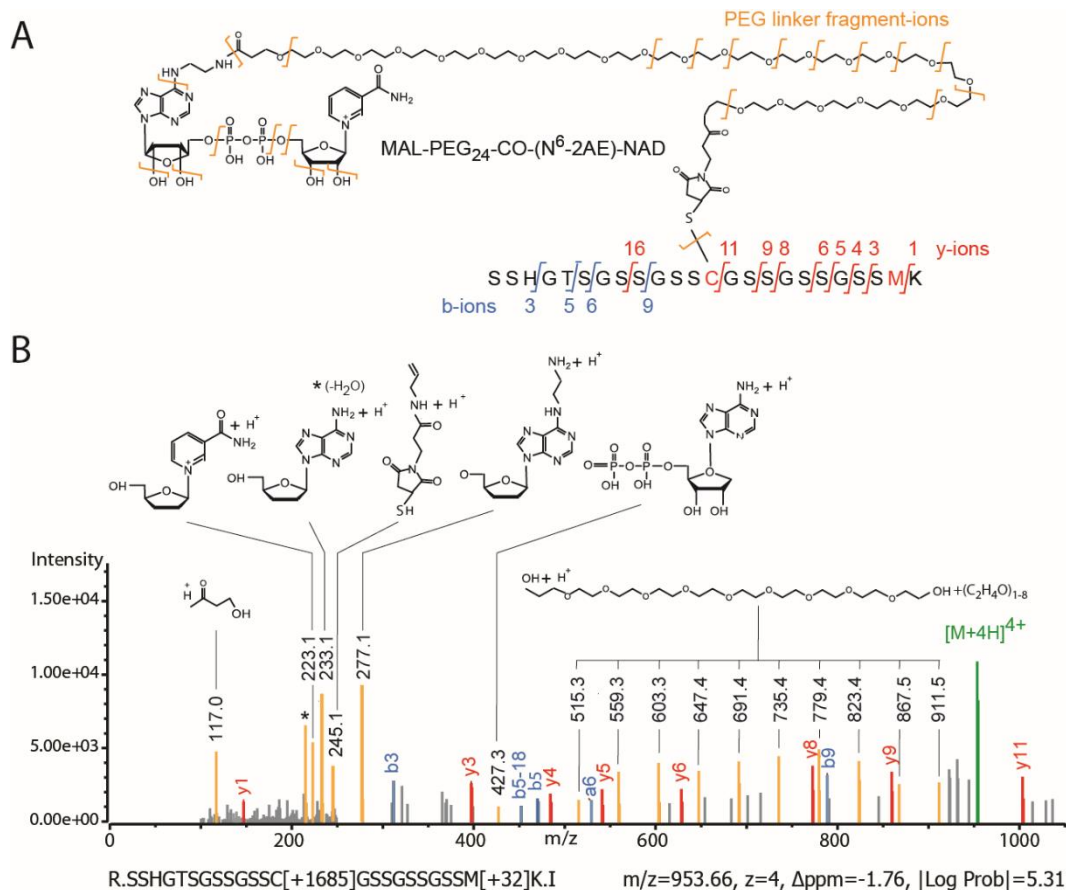

743

744 **Supplementary Figure 4: Confirmation of functional Mal-PEG<sub>24</sub>-2AE-NAD<sup>+</sup> linkage to G3PD<sub>Ec</sub>-NOX<sub>Ca</sub>-**  
 745 **Est2<sub>Aa</sub> residue Cys369.** **a**, Cartoon of the chemical structure of MAL-PEG<sub>24</sub>-2AE-NAD<sup>+</sup> conjugated to  
 746 G3PD<sub>Ec</sub>-NOX<sub>Ca</sub>-Est2<sub>Aa</sub> residue Cys369 of tryptic peptide SSHGTSGSSGSSCGSSGSSGSSMK highlighting  
 747 different MSMS fragment ions (peptide b-ions, blue; peptide y-ions, MAL-PEG<sub>24</sub>-2AE-NAD<sup>+</sup> CID ions,  
 748 gold). **b**, Annotated LC-MS/MS evidence spectrum for a high-scoring  
 749 R.SSHGTSGSSGSSC[+1685]GSSGSSGSSM[+32]K.I peptide highlighting peptide b- and y-ions (blue, red)  
 750 as well as the observed masses and chemical structures of matching MAL-PEG<sub>24</sub>-2AE-NAD<sup>+</sup> fragments.  
 751 The observed +1685Da mass modification and fragmentation pattern is consistent with G3PD<sub>Ec</sub>-NOX<sub>Ca</sub>-  
 752 Est2<sub>Aa</sub> Cys396 being tethered to a functional MAL-PEG<sub>24</sub>-2AE-NAD<sup>+</sup> linker.

753

754

755 **Nanomachine immobilization onto agarose beads and nanomachine**  
 756 **conjugation to modified cofactors.**

757

758 **Synthesis of thiohexyltrifluoroketone (hTFK).**

759 1,6-Hexanedithiol (601 mg, 0.612 mL, 4 mmol) was added to a stirred mixture of NaHCO<sub>3</sub> (4 mmol) in  
 760 anhydrous dichloromethane (8 mL) under a nitrogen atmosphere. Bromotrifluoroacetone (0.415 mL,

761 0.4 mmol) was then added dropwise. Reaction was monitored by TLC. The reaction mixture was stirred  
762 under N<sub>2</sub> for 5 days at room temperature and then poured into 50 mL water. After extraction with  
763 ether (3 x 30 mL), the organic solvent was dried (MgSO<sub>4</sub>) and the solvent removed under reduced  
764 pressure. Thiohexyltrifluoroketone was characterised by LC-MS; aHPLC (20 – 80% gradient MeCN into  
765 H<sub>2</sub>O, 0.1% TFA) gave a single peak at 6.6 min ( $\lambda = 214$  nm), > 90% purity, ESI (negative scan mode)  
766 found 259.16 amu; calculated MW = 260.33. hTFK could be used directly in loading the DVS-modified  
767 beads.

768

### 769 Synthesis of hTFK-vinylsulfone activated beads.

770 4% crosslinked agarose (Sepharose CL-4B, GE Healthcare) was functionalized by treatment with  
771 divinylsulfone (DVS) to yield the vinylsulfone decorated agarose as an aqueous slurry with vinyl  
772 sulfones at approximately 1 mmol mL<sup>-1</sup> of slurry. To 500 g of damp drained Sepharose CL-4B was added  
773 500 mL of 0.5 M Na<sub>2</sub>CO<sub>3</sub> (pH 12) and 5000  $\mu$ L divinylsulfone. The resulting suspension was stirred  
774 gently for 70 min at room temperature before being washed extensively with water. The solution was  
775 stored as a 1:1 w/v slurry in 50% ethanol/water. This activated DVS-agarose was then reacted with  
776 thiohexyltrifluoroketone (hTFK) at approximately 5 molar percent ratio for between 6 h and overnight  
777 before capping all remaining vinyl sulfone functionalities with 2-mercaptoethanol. Saturated NaHCO<sub>3</sub>  
778 solution (20 mL), and thiohexyl trifluoroketone (1.2 mL ethanol solution containing 26 mg of  
779 compound, 0.1 mmol, 5% loading) were added to the divinyl sulfone resin (200 mL, 16-20 mmol, 50%  
780 slurry in 1:1 ethanol/water) and stirred at room temperature for 2 h; excessive reactive sites were  
781 blocked by the addition of beta-mercaptoethanol (2.8 mL, 40 mmol) and washed with 50%  
782 ethanol/water until no smell was evident. The hTFK-loaded agarose gel obtained was filtered, washed  
783 and stored as a 1:1 slurry in 50% ethanol/water for further use. The synthesis scheme is summarized  
784 below (Supplementary Scheme 2).

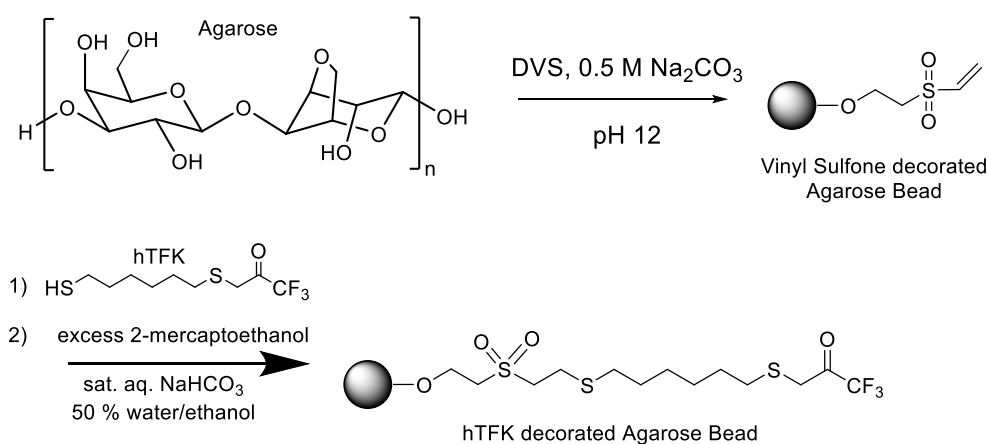

785



786

787 **Supplementary Scheme 2. Scheme for the preparation of hTFK decorated agarose beads via**  
788 **vinylsulfone activation.**

789

790 **Immobilization of GlpK<sub>TK</sub>-AceK<sub>M5</sub>-Est2<sub>Aa</sub> to Sepharose-DVS-hTFK.**

791 A lysate from 8 g GlpK<sub>TK</sub>-AceK<sub>M5</sub>-Est2<sub>Aa</sub> cells prepared as described previously (200 mL) was added to  
792 25 g Sepharose-DVS-hTFK, and the slurry mixed at 4 °C. The loss of esterase activity in the supernatant  
793 was monitored and after 2.5 h there was no further loss of esterase activity, and the adsorbent  
794 containing 5.2 U esterase per g beads, corresponding to an estimated 0.8 mg GlpK<sub>TK</sub>-AceK<sub>M5</sub>-Est2<sub>Aa</sub> per  
795 g, or 6 nmol GlpK<sub>TK</sub>-AceK<sub>M5</sub>-Est2<sub>Aa</sub> per gram, was filtered and washed.

796

797 **Tethering of MAL-PEG<sub>24</sub>-2AE-ADP to immobilized Sepharose-DVS-TFK-GlpK<sub>TK</sub>-AceK<sub>M5</sub>-Est2<sub>Aa</sub>.**

798 The Sepharose-DVS-GlpK<sub>TK</sub>-AceK<sub>M5</sub>-Est2<sub>Aa</sub> (25 g) was incubated in Tris-buffered saline pH 7.0 containing  
799 1 mM TCEP for 1.5 h at 4 °C before being washed with extensively degassed PBS containing 0.5 mM  
800 EDTA. An equal volume of this buffer was added to the slurry together with 0.8 μmol MAL-PEG<sub>24</sub>-2AE-  
801 ADP and the mixture allowed to react for 6 h at 4 °C with mixing. The slurry was then filtered and  
802 washed with TBS.

803

804 **Immobilization of G3PD<sub>Ec</sub>-NOX<sub>Ca</sub>-Est2<sub>Aa</sub> to Sepharose-DVS-hTFK.**

805 To lysate from 10.6 g G3PDEc-NOX<sub>Ca</sub>-Est2<sub>Aa</sub> cell paste prepared as described for the purification of  
806 G3PD<sub>Ec</sub>-NOX<sub>Ca</sub>-Est2<sub>Aa</sub> above was added 80 g Sepharose-DVS-hTFK and the mixture stirred gently for  
807 100 min at 4 °C. The slurry was filtered and washed with extensively degassed PBS containing 0.5 mM  
808 EDTA and 10 μM TCEP.

809

810 **Tethering of MAL-PEG<sub>24</sub>-2AE-NAD<sup>+</sup> to immobilized Sepharose-DVS-TFK-G3PD<sub>Ec</sub>-NOX<sub>Ca</sub>-**  
811 **Est2<sub>Aa</sub>.**

812 To 35 mL of the slurry was added an equal volume of this buffer together with 580 nmol MAL-PEG<sub>24</sub>-  
813 2AE-NAD<sup>+</sup> and the mixture allowed to react at 4 °C with mixing for 30 min before being filtered and  
814 washed with PBS containing 1 mM TCEP.

815

## 816 **Reactor Assembly**

817

818 In line with the intended modular, hierarchal organization of our nanomachine technology, we  
819 optimized each nanomachine reactor individually and then combined them into a serial multi-enzyme  
820 D-fagomine nanofactory as shown in Figure 2.

821

### 822 **The Phosphotransfer Reactor**

823 For the preparation of the phosphotransfer reactor (Figure 2), 40 mg of GlpK<sub>TK</sub>-AceK<sub>MS</sub>-Est2<sub>Aα</sub> protein  
824 (296 nmol) was immobilized onto 25 g of Sepharose–hexyl-DVS-TFK beads. The immobilized GlpK<sub>TK</sub>-  
825 AceK<sub>MS</sub>-Est2<sub>Aα</sub> was treated with 0.1 mM TCEP, washed with PBS containing 0.5 mM EDTA then reacted  
826 with six equivalents MAL-PEG<sub>24</sub>-2AE-ADP for 6 h at 4 °C before being washed with reaction buffer (0.2  
827 M sodium citrate buffer pH 7.9). The resultant immobilized cofactor-tethered nanomachine beads  
828 were analyzed for glycerol kinase activity in the presence and absence of ATP in batch reactions, and  
829 demonstrated to have ~30% tethering efficiency (activity without added ADP calculated as the  
830 percentage of activity with added ADP). The resultant immobilized nanomachine beads were then  
831 packed into a 25 mm\*15 mm Benchmark column (Kinesis, Australia) to a packed bed volume of 21.2  
832 mL and performance assessed in a flow reactor system.

833 A bioreactor packed with the immobilized GlpK<sub>TK</sub>-ATP<sub>teth</sub>-AceK<sub>MS</sub>-Est2<sub>Aα</sub> nanomachine beads was found  
834 to convert 10 mM glycerol and 10 mM acetyl phosphate to G3P and acetate with approximately 60%  
835 efficiency at the optimal flow rate of 0.25 mL min<sup>-1</sup> (Supplementary Figure 5a). This resulted in a  
836 space time yield of 70 mg G3P L<sup>-1</sup> hr<sup>-1</sup> mg<sup>-1</sup> protein. The bioreactor stability was further assessed by  
837 continuing to run the phosphotransfer reactor for a total time of 870 minutes resulting in a total 14222  
838 turnovers of the tethered cofactor (Figure 3).

839

### 840 **The Oxidation Reactor**

841 For the preparation of the G3PD<sub>Ec</sub>-NOX<sub>Ca</sub>-Est2<sub>Aα</sub> oxidation reactor (step 2 in Figure 2), 80 mg of G3PD<sub>Ec</sub>-  
842 NOX<sub>Ca</sub>-Est2<sub>Aα</sub> protein (647 nmol; 1260 esterase U) was immobilized onto 80 g of Sepharose–hexyl-  
843 DVS-TFK. The immobilized G3PD<sub>Ec</sub>-NOX<sub>Ca</sub>-Est2<sub>Aα</sub> was treated with TCEP, washed with degassed,  
844 sparged PBS containing 0.5 mM EDTA then reacted with six equivalents MAL-PEG<sub>24</sub>-2AE-NAD<sup>+</sup> for 6 h  
845 at 4 °C before being washed with PBS. The resultant immobilized cofactor-tethered nanomachine  
846 beads were analyzed for glycerol-3-phosphate dehydrogenase activity in the presence and absence of

847 NAD<sup>+</sup> in batch reactions, and demonstrated to have ~ 80% tethering efficiency (activity without added  
848 NAD<sup>+</sup> calculated as the percentage of activity with added NAD<sup>+</sup>). The resultant immobilized  
849 nanomachine beads were then packed into a 250 mm x 15 mm Benchmark column (Kinesis, Australia)  
850 to a packed bed volume of 28.3 mL and assessed in a flow reactor system.

851 A column packed with the adsorbent was found to convert 10 mM G3P to DHAP with about 40 – 50%  
852 efficiency at a flow rate of 0.25 mL min<sup>-1</sup> (Supplementary Figure 5b). This resulted in a space time yield  
853 of 2.60 mg DHAP L<sup>-1</sup> hr<sup>-1</sup> mg<sup>-1</sup> protein. The bioreactor stability was further assessed by continuing to  
854 run the oxidation reactor for a total time of 6000 minutes resulting in a total 1843 turnovers of the  
855 tethered cofactor (Figure 3).

856

### 857 **The Aldol Addition Reactor**

858 For the preparation of immobilized nanomachine beads for the aldol addition reactor, 20 mg of FruA<sub>Sc</sub>-  
859 Est2<sub>Ad</sub> protein was reacted with 20 g of Sepharose–hexyl-DVS-TFK beads. The resultant immobilized  
860 aldolase nanomachine beads were then packed into a 150 mm x 15 mm Benchmark column (Kinesis,  
861 Australia) to a final depth of 10 cm (17.7 mL packed bed volume) and assessed in a flow reactor system.  
862 Optimal flow rate was assessed for the aldol reactor and found to be 0.1 mL min<sup>-1</sup>, with approximately  
863 86% and 98% conversion of 5 mM *N*-Cbz-3-aminopropanal and 5 mM DHAP respectively, under these  
864 conditions (Supplementary Figure 5c).

**a Phosphotransfer reactor**

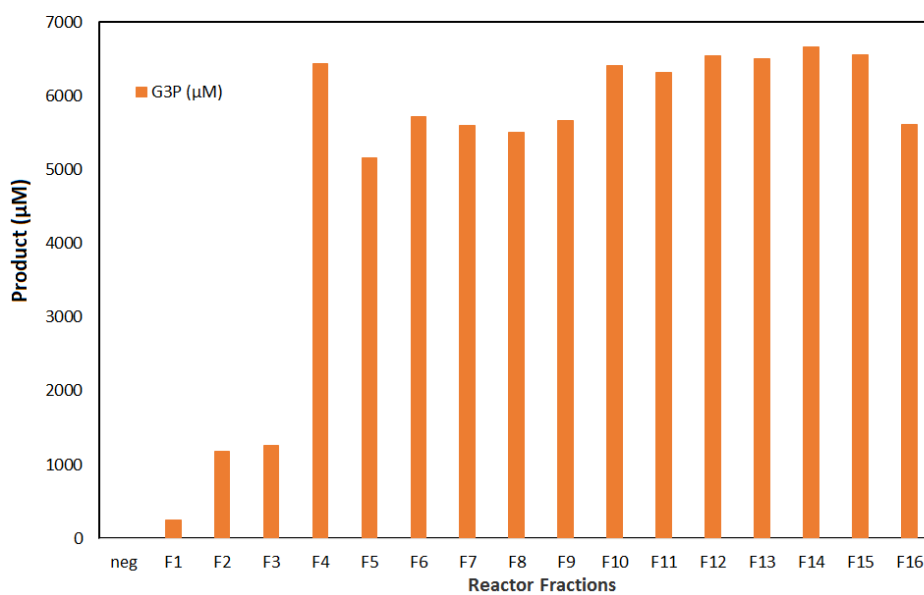

**b Oxidation reactor**

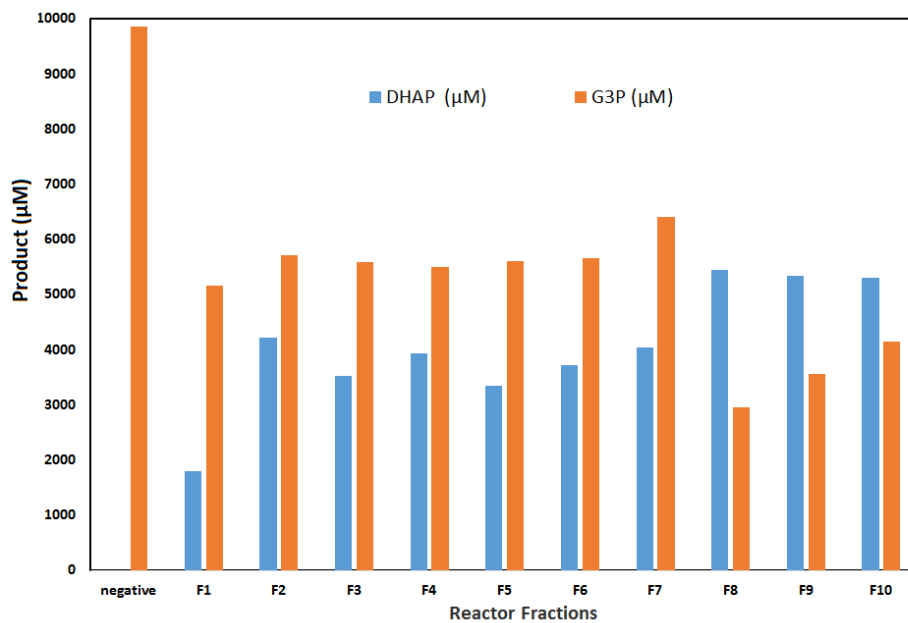

**c Aldol Addition Reactor**

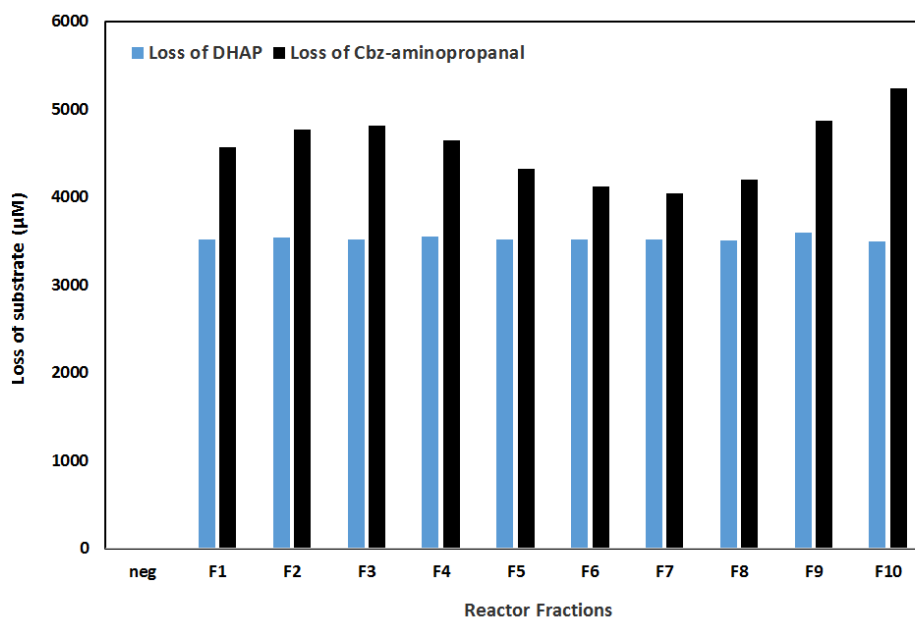

866 **Supplementary Figure 5. Assembly and testing of each of the nanomachine reactors used to**  
867 **assemble the Nanofactory. a**, Phosphotransfer Reactor: Conversion of glycerol and acetyl phosphate  
868 (10 mM each) to G3P and acetate by immobilized GlpK<sub>TK</sub>-ATP<sub>teth</sub>-AceK<sub>Ms</sub>-Est2<sub>Aa</sub> in a packed bed reactor  
869 column (1.5 cm id, 12 cm) run at a flow rate of 0.25 mL min<sup>-1</sup>, as determined by LCMS analysis of 5 mL  
870 fractions. **b**, Oxidation reactor: conversion of G3P to DHAP in a flow reactor. The immobilized G3PD<sub>Ec</sub>-  
871 NAD<sub>teth</sub>-NOX<sub>Ca</sub>-Est2<sub>Aa</sub> nanomachine beads were used to prepare a packed bed reactor column (1.5 cm  
872 id x 16.5 cm). 10 mM G3P pH 8 was passed through the column at a flow rate of 0.25 mL min<sup>-1</sup> and the  
873 amount of G3P remaining and DHAP produced determined by LCMS for 5 mL fractions F1 to F10. **c**,  
874 Aldol addition reactor with Fru<sub>Sc</sub>-E2<sub>Aa</sub>: conversion of Cbz-aldehyde and DHAP into *N*-Cbz-3S,4R-ADHOP  
875 in a flow reactor. The immobilized Fru<sub>Sc</sub>-E2<sub>Aa</sub> nanomachine beads prepared in the presence of 10 μM  
876 TCEP were used to prepare a packed bed reactor column (1.5 cm id x 16.5 cm). 5 mM *N*-Cbz-3-  
877 aminopropanal and DHAP in 50 mM citrate buffer pH 7 was passed through the column at a flow rate  
878 of 0.1 mL min<sup>-1</sup> and the amount of DHAP and *N*-Cbz-3-aminopropanal remaining quantified by LCMS  
879 for 5 mL fractions F1 to F10.

880

## 881 **Enzyme activity assays (In batch and in flow)**

882

### 883 **Glycerol kinase activity**

884 Glycerol kinase assays were performed at room temperature in 1 mL volume with direct detection of  
885 ADP and ATP by HPLC analysis of reaction supernatant. A typical reaction contained 1 mM glycerol,  
886 10 mM MgCl<sub>2</sub>, 50 mM NaHCO<sub>3</sub> buffer pH 9.0, 1 mM ATP with approximately 2 μg mL<sup>-1</sup> enzyme  
887 (~35 nM). Kinetics were determined by varying the concentrations of ATP or glycerol whilst  
888 maintaining the other in excess, and kinetic determinants calculated using Hyper<sup>TM</sup> (J.S. Easterby,  
889 Liverpool University) or GraphPad Prism (GraphPad Software Inc., USA). Substrate and cofactor  
890 concentrations ranged from 0.1 to 10 x K<sub>M</sub>.

891

### 892 **Acetate kinase activity.**

893 Acetate kinase assays were conducted in the same manner as the glycerol kinase assays described  
894 above, replacing ATP with ADP, and glycerol with acetyl phosphate or phosphoenol pyruvate. Kinetics  
895 were determined by varying the concentrations of ADP or acetyl phosphate or phosphoenol pyruvate  
896 whilst maintaining the other components in excess, and kinetic determinants calculated using Hyper  
897 (J.S. Easterby, Liverpool University). Substrate and cofactor concentrations ranged from 0.1 to 10 x K<sub>M</sub>.

898

### 899 **Glycerol-3-phosphate dehydrogenase activity**

900 Glycerol-3-phosphate (G3P) dehydrogenase activity was determined from the oxidation of glycerol-3-  
901 phosphate to DHAP in 50 mM sodium phosphate pH 9.0 for individual enzyme assays, or at pH 8.0 for  
902 combined multienzyme reactions, with the reaction progress followed by monitoring the production  
903 of NADH spectroscopically at 340 nm ( $\epsilon_{340\text{ nm}} 6.22\text{ mM}^{-1}\text{cm}^{-1}$ ), or by direction detection of both G3P

904 (substrate) and DHAP (product) using LCMS (see Analytical methods and Supplementary Figure 6),  
905 with one unit of glycerol-3-phosphate activity defined as the amount required to oxidize 1  $\mu\text{mol}$  G3P  
906 in one minute at ambient temperature. Kinetics were determined by varying the concentration of G3P  
907 and  $\text{NAD}^+$  from 0.1 to 10  $\times K_M$  and kinetic determinants were calculated using Hyper<sup>TM</sup> (J.S. Easterby,  
908 Liverpool University) or GraphPad Prism (GraphPad Software Inc., USA).

909

#### 910 **NADH oxidase activity (untethered).**

911 NADH oxidase activity was determined from the oxidation of 0.1 mM NADH in 50 mM sodium  
912 phosphate pH 7 containing 1  $\text{mg mL}^{-1}$  BSA, with the loss of NADH monitored spectroscopically at  
913 340 nm ( $\epsilon_{340\text{ nm}} 6.22 \text{ mM}^{-1}\text{cm}^{-1}$ ), with one unit of NADH oxidase activity defined as the amount required  
914 to oxidize 1  $\mu\text{mol}$  NADH in one minute at ambient temperature. Kinetics were determined by varying  
915 the concentration of NADH from 0.1 to 10  $\times K_M$  and kinetic determinants were calculated using  
916 Hyper<sup>TM</sup> (J.S. Easterby, Liverpool University) or GraphPad Prism (GraphPad Software Inc., USA).

917

#### 918 **Esterase activity.**

919 Esterase activity was determined from the hydrolysis of *p*-nitrophenyl acetate (Sigma) in 50 mM  
920 sodium phosphate pH 7 containing 1  $\text{mg mL}^{-1}$  BSA and with a typical reaction containing 0.4 mM *p*-  
921 nitrophenyl acetate. The hydrolysis of *p*-nitrophenyl acetate was determined spectroscopically by the  
922 increase in absorbance at 405 nm due to production of *p*-nitrophenol ( $\epsilon_{405\text{ nm}} 18 \text{ mM}^{-1}\text{cm}^{-1}$ ), with one  
923 unit of esterase activity defined as the amount required to hydrolyze 1  $\mu\text{mol}$  *p*-nitrophenyl acetate in  
924 one minute at ambient temperature. Kinetics were determined by varying the concentration of  
925 substrate from 0.1 to 10  $\times K_M$  and kinetic determinants were calculated using Hyper<sup>TM</sup> (J.S. Easterby,  
926 Liverpool University) or GraphPad Prism (GraphPad Software Inc., USA).

927

## 928 **Analytical Methods**

929

#### 930 **HPLC separation of ATP and ADP.**

931 HPLC separation was conducted using an Agilent Eclipse XDB column (50 mm x 4.6 mm) with isocratic  
932 elution using 75% solvent A and 25% solvent B. Solvent A: 20 mM tetrabutylammonium phosphate

933 (TBAP) in 10 mM ammonium phosphate buffer pH 4.0; solvent B: acetonitrile. Flow rate 1 mL per  
934 minute, detection at 240 nm using diode array detector (Agilent Technologies, USA). Peaks eluted at  
935 the following retention times: ADP 1.2 min, ATP 1.8 min.

936

937 **LCMS analysis of glycerol-3-phosphate (G3P), dihydroxyacetone phosphate (DHAP) and**  
938 **aldol products.**

939 G3P and DHAP were separated using a modification of the method described in Prieto-Blanc *et al.*,  
940 2010<sup>32</sup>. Chromatographic conditions were SIELC ObeliscN column (100 mm x 2.1 mm) with isocratic  
941 elution using 20% mobile phase A, 80% mobile phase B for 5 minutes. Mobile phase A: 25 mM  
942 ammonium formate pH 4.0; mobile phase B: acetonitrile. Mass spectrophotometric detection was  
943 conducted using API-ES negative mode with an Agilent 6120 Quadropole LCMS. Compounds were  
944 qualitatively detected by ion scanning in both positive and negative mode using know standards, and  
945 then quantified based on selected ion monitoring (SIM) monitoring of relevant ions. Glycerol-3-  
946 phosphate was quantified by selected ion monitoring of ion [M]<sup>-</sup>  $m/z = 171.06$ , DHAP quantified by  
947 selected ion monitoring of ion [M]<sup>-</sup>  $m/z = 169.04$ , after establishing suitable selected ions using positive  
948 and negative scanning of standards. Quantitation was based on comparison to standard calibration  
949 curves produced in the same manner. *N*-Cbz-3-aminopropanal and *N*-Cbz-3*S*,4*R*-ADHOP were  
950 detected and quantified using absorbance  $A_{214nm}$  and selected ion monitoring of ion [M-H]<sup>-</sup>  $m/z =$   
951  $376.09$  (*N*-Cbz-3*S*,4*R*-ADHOP) by comparison with calibration curves made using a synthesised  
952 standard (Supplementary Figure 6). The *N*-Cbz-3*S*,4*R*-ADHOP standard was synthesised from DHAP  
953 (Sigma-Aldrich) and *N*-Cbz-3-aminopropanal (Sigma-Aldrich) using enzymatic aldol addition with  
954 purified FruA<sub>Sc</sub> and the resultant *N*-Cbz-3*S*,4*R*-ADHOP was purified essentially as described by Castillo  
955 and colleagues<sup>17</sup>. <sup>1</sup>H-NMR spectroscopy confirmed the purity of the standard (Supplementary Figure  
956 6c) and this standard was then used to identify and quantitate the *N*-Cbz-3*S*,4*R*-ADHOP produced from  
957 the nanofactory by selected ion monitoring.

958

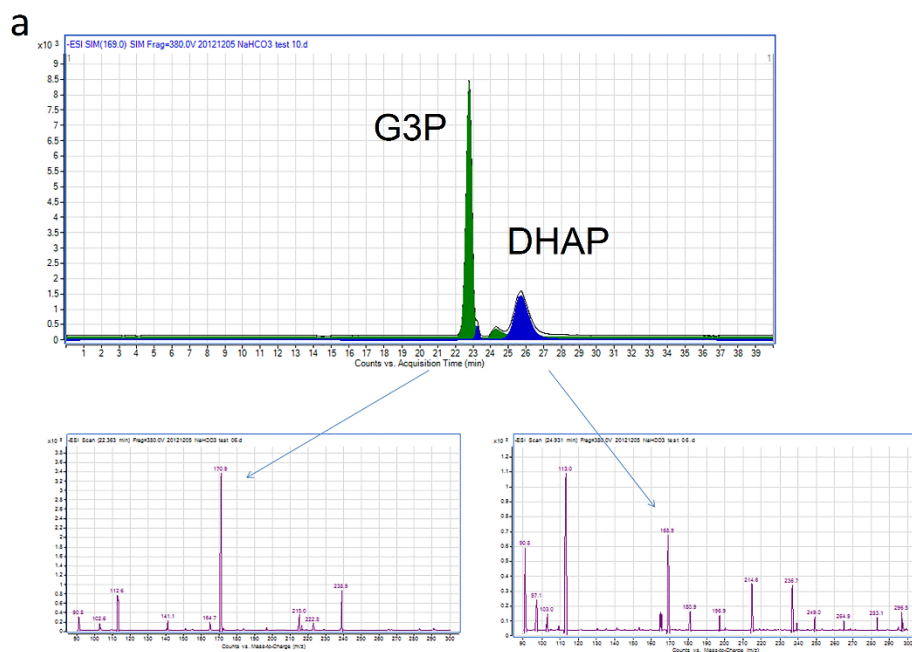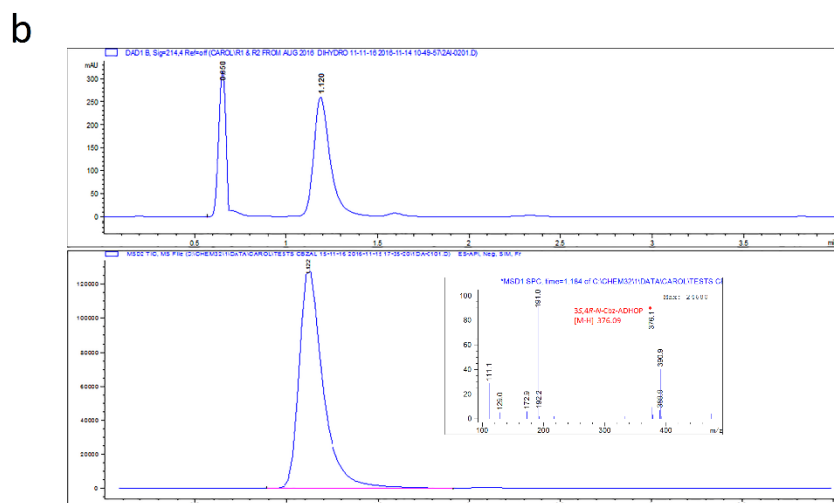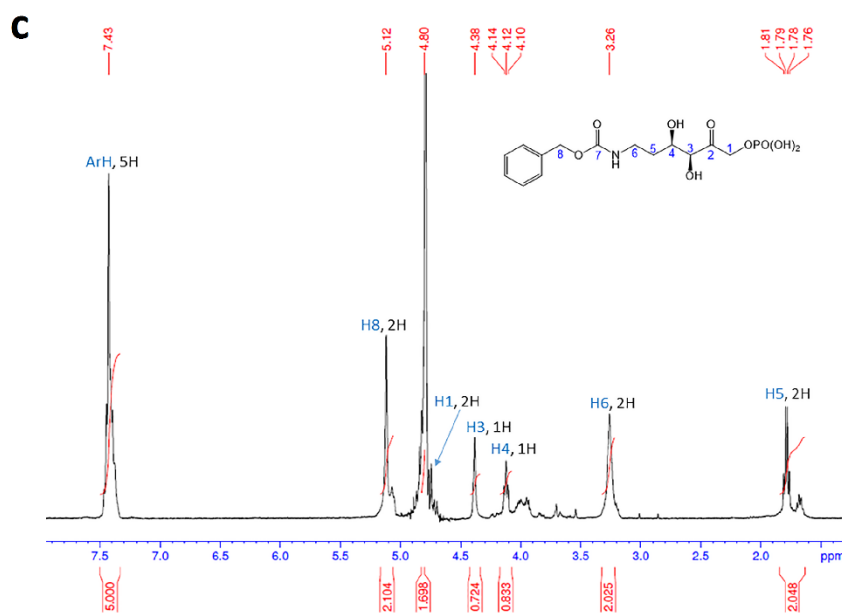



960 **Supplementary Figure 6. HPLC and HPLC-MS traces and spectra for all components quantified to**  
961 **measure the conversion of glycerol and aldehydes into chiral aldol products. a,** HPLC separation and  
962 mass spectrometry identification of glycerol-3-phosphate (G3P) and dihydroxy acetone phosphate  
963 (DHAP). The dominant selected ions identified here ( $m/z$  171<sup>-</sup> for G3P and  $m/z$  169<sup>-</sup> for DHAP) were  
964 then used for SIM analyzes of subsequent reactions. **b,** HPLC separation of *N*-Cbz-3-aminopropanal  
965 and *N*-Cbz-3*S*,4*R*-ADHOP showing absorbance  $A_{214nm}$  (upper panel) and mass spectrometry  
966 identification of *N*-Cbz-3*S*,4*R*-ADHOP (inset). **c,** the authenticity of *N*-Cbz-3*S*,4*R*-amino-3,4-dihydroxy-  
967 2-oxyhexyl phosphate (*N*-Cbz-3*S*,4*R*-ADHOP) produced by the nanofactory was confirmed by <sup>1</sup>H-NMR  
968 analysis of *N*-Cbz-3*S*,4*R*-ADHOP prepared by reaction of commercially available *N*-Cbz-3-  
969 aminopropanal and DHAP catalysed by FruA, and isolated by HPLC.

970

971

972

973

974

975

976
